# Supplementary material for: Cost-effectiveness of implementing HIV and HIV/syphilis dual testing among key populations in Viet Nam: a modelling analysis
Source: PubMed Central journal article supplement (PMC9379490; doi:10.1136/bmjopen-2021-056887), 2022-08-11
Supplement: bmjopen-2021-056887.draft_revisions.pdf [file bmjopen-2021-056887.draft_revisions.pdf]

# BMJ Open

BMJ Open is committed to open peer review. As part of this commitment we make the peer review history of every article we publish publicly available.

When an article is published we post the peer reviewers' comments and the authors' responses online. We also post the versions of the paper that were used during peer review. These are the versions that the peer review comments apply to.

The versions of the paper that follow are the versions that were submitted during the peer review process. They are not the versions of record or the final published versions. They should not be cited or distributed as the published version of this manuscript.

BMJ Open is an open access journal and the full, final, typeset and author-corrected version of record of the manuscript is available on our site with no access controls, subscription charges or pay-per-view fees (<http://bmjopen.bmj.com>).

If you have any questions on BMJ Open's open peer review process please email [info.bmjopen@bmj.com](mailto:info.bmjopen@bmj.com)

# BMJ Open

## Cost-effectiveness of implementing HIV and HIV/syphilis dual testing among key populations in Viet Nam: a modeling analysis

|                               |                                                                                                                                                                                                                                                                                                                                                                                                                                                                                                                                                                                                                                                                                                                                                                                                                                                                                                                                                                                                                                                                                                                                                                                                                                                                                                                                                                                                                                                                                                                                                                                                                                        |
|-------------------------------|----------------------------------------------------------------------------------------------------------------------------------------------------------------------------------------------------------------------------------------------------------------------------------------------------------------------------------------------------------------------------------------------------------------------------------------------------------------------------------------------------------------------------------------------------------------------------------------------------------------------------------------------------------------------------------------------------------------------------------------------------------------------------------------------------------------------------------------------------------------------------------------------------------------------------------------------------------------------------------------------------------------------------------------------------------------------------------------------------------------------------------------------------------------------------------------------------------------------------------------------------------------------------------------------------------------------------------------------------------------------------------------------------------------------------------------------------------------------------------------------------------------------------------------------------------------------------------------------------------------------------------------|
| Journal:                      | <i>BMJ Open</i>                                                                                                                                                                                                                                                                                                                                                                                                                                                                                                                                                                                                                                                                                                                                                                                                                                                                                                                                                                                                                                                                                                                                                                                                                                                                                                                                                                                                                                                                                                                                                                                                                        |
| Manuscript ID                 | bmjopen-2021-056887                                                                                                                                                                                                                                                                                                                                                                                                                                                                                                                                                                                                                                                                                                                                                                                                                                                                                                                                                                                                                                                                                                                                                                                                                                                                                                                                                                                                                                                                                                                                                                                                                    |
| Article Type:                 | Original research                                                                                                                                                                                                                                                                                                                                                                                                                                                                                                                                                                                                                                                                                                                                                                                                                                                                                                                                                                                                                                                                                                                                                                                                                                                                                                                                                                                                                                                                                                                                                                                                                      |
| Date Submitted by the Author: | 04-Oct-2021                                                                                                                                                                                                                                                                                                                                                                                                                                                                                                                                                                                                                                                                                                                                                                                                                                                                                                                                                                                                                                                                                                                                                                                                                                                                                                                                                                                                                                                                                                                                                                                                                            |
| Complete List of Authors:     | Coomes, David; University of Washington, Department of Epidemiology; University of Washington, Department of Global Health<br>Green, Dylan; University of Washington, Department of Epidemiology; University of Washington, Department of Global Health<br>Barnabas, Ruanne; University of Washington, Department of Global Health; University of Washington, Department of Medicine<br>Sharma, Monisha; University of Washington, Department of Global Health<br>Barr-DiChiara, Magdalena; World Health Organization, Department of Global Programmes of HIV, Hepatitis and HIV<br>Jamil, Muhammad; World Health Organization, Department of Global Programmes of HIV, Hepatitis and HIV<br>Baggaley, R; World Health Organization, Department of Global Programmes of HIV, Hepatitis and HIV<br>Owiredu, Morkor Newman; World Health Organization, Department of Global Programmes of HIV, Hepatitis and HIV<br>Macdonald, Virginia; World Health Organization, Headquarters<br>Nguyen, Van Thi Thuy; World Health Organization, Viet Nam Country Office<br>Vo, Son; Government of Viet Nam Ministry of Health, Viet Nam Authority for HIV/AIDS Prevention and Control<br>Taylor, Melanie; Centers for Disease Control and Prevention, Division of STD Prevention<br>Wi, Teodora; World Health Organization, Department of Reproductive Health and Research<br>Johnson, Cheryl; World Health Organization, Headquarters; London School of Hygiene & Tropical Medicine, Clinical Research Department<br>Drake, Alison L.; University of Washington, Department of Global Health; University of Washington, Department of Epidemiology |
| Keywords:                     | HEALTH ECONOMICS, HIV & AIDS < INFECTIOUS DISEASES, PUBLIC HEALTH                                                                                                                                                                                                                                                                                                                                                                                                                                                                                                                                                                                                                                                                                                                                                                                                                                                                                                                                                                                                                                                                                                                                                                                                                                                                                                                                                                                                                                                                                                                                                                      |
|                               |                                                                                                                                                                                                                                                                                                                                                                                                                                                                                                                                                                                                                                                                                                                                                                                                                                                                                                                                                                                                                                                                                                                                                                                                                                                                                                                                                                                                                                                                                                                                                                                                                                        |

SCHOLARONE™  
Manuscripts

1  
2  
3  
4  
5  
6  
7  
8  
9  
10  
11  
12  
13  
14  
15  
16  
17  
18  
19  
20  
21  
22  
23  
24  
25  
26  
27  
28  
29  
30  
31  
32  
33  
34  
35  
36  
37  
38  
39  
40  
41  
42  
43  
44  
45  
46  
47  
48  
49  
50  
51  
52  
53  
54  
55  
56  
57  
58  
59  
60



I, the Submitting Author has the right to grant and does grant on behalf of all authors of the Work (as defined in the below author licence), an exclusive licence and/or a non-exclusive licence for contributions from authors who are: i) UK Crown employees; ii) where BMJ has agreed a CC-BY licence shall apply, and/or iii) in accordance with the terms applicable for US Federal Government officers or employees acting as part of their official duties; on a worldwide, perpetual, irrevocable, royalty-free basis to BMJ Publishing Group Ltd ("BMJ") its licensees and where the relevant Journal is co-owned by BMJ to the co-owners of the Journal, to publish the Work in this journal and any other BMJ products and to exploit all rights, as set out in our [licence](#).

The Submitting Author accepts and understands that any supply made under these terms is made by BMJ to the Submitting Author unless you are acting as an employee on behalf of your employer or a postgraduate student of an affiliated institution which is paying any applicable article publishing charge ("APC") for Open Access articles. Where the Submitting Author wishes to make the Work available on an Open Access basis (and intends to pay the relevant APC), the terms of reuse of such Open Access shall be governed by a Creative Commons licence – details of these licences and which [Creative Commons](#) licence will apply to this Work are set out in our licence referred to above.

Other than as permitted in any relevant BMJ Author's Self Archiving Policies, I confirm this Work has not been accepted for publication elsewhere, is not being considered for publication elsewhere and does not duplicate material already published. I confirm all authors consent to publication of this Work and authorise the granting of this licence.

1  
21 **Cost-effectiveness of implementing HIV and HIV/syphilis dual testing among key populations in Viet Nam: a**  
3  
42 **modeling analysis**

5  
63 David Coomes<sup>1,2</sup>, Dylan Green<sup>1,2</sup>, Ruanne Barnabas<sup>1,2,3</sup>, Monisha Sharma<sup>2</sup>, Magdalena Barr-DiChiara<sup>4</sup>,  
7  
84 Muhammad S. Jamil<sup>4</sup>, Rachel Baggaley<sup>4</sup>, Morkor Newman Owiredu<sup>4</sup>, Virginia Macdonald<sup>5</sup>, Van Nguyen<sup>6</sup>, Son  
95 Vo Hai<sup>7</sup>, Melanie M. Taylor<sup>4,8</sup>, Teodora E Wi<sup>9</sup>, Cheryl Johnson<sup>5,10</sup>, Alison L. Drake<sup>1,2§</sup>

- 10  
11  
12 1. University of Washington, Department of Epidemiology, Seattle, WA, USA  
13  
14 2. University of Washington, Department of Global Health, Seattle, WA, USA  
15  
16 3. University of Washington, Department of Medicine, Seattle, WA, USA  
17  
18 4. Department of Global Programmes of HIV, Hepatitis and HIV, World Health Organization, Geneva,  
19  
20 Switzerland  
21  
22 5. Headquarters, World Health Organization, Geneva, Switzerland  
23  
24 6. Viet Nam Country Office, World Health Organization, Hanoi, Viet Nam  
25  
26 7. Viet Nam Authority for HIV/AIDS Prevention and Control, Ministry of Health, Hanoi, Viet Nam  
27  
28 8. Division of STD Prevention, Centers for Disease Control and Prevention, Atlanta, GA, USA  
29  
30 9. Department of Reproductive Health and Research, World Health Organization, Geneva, Switzerland  
31  
32 10. Clinical Research Department, London School of Hygiene and Tropical Medicine, London, United  
33  
34 Kingdom

35  
36 § Corresponding author: Alison L. Drake

37  
38 325 9th Avenue  
39  
40 Box 359909  
41  
42 Seattle, WA 98195, USA  
43  
44 Phone: 1-206-543-5847  
45  
46 Email: [adrake2@uw.edu](mailto:adrake2@uw.edu)

47  
48  
49 Disclaimer: The views expressed in this manuscript are those of the authors and do not necessarily represent the  
50  
51 official position of the World Health Organization or the United States Centers for Disease Control  
52  
53

54  
55  
56 Word count: 3,652

57  
58  
59 Abstract word count: 247

60  
61  
62  
63  
64  
65  
66  
67  
68  
69  
70  
71  
72  
73  
74  
75  
76  
77  
78  
79  
80  
81  
82  
83  
84  
85  
86  
87  
88  
89  
90  
91  
92  
93  
94  
95  
96  
97  
98  
99  
100  
101  
102  
103  
104  
105  
106  
107  
108  
109  
110  
111  
112  
113  
114  
115  
116  
117  
118  
119  
120  
121  
122  
123  
124  
125  
126  
127  
128  
129  
130  
131  
132  
133  
134  
135  
136  
137  
138  
139  
140  
141  
142  
143  
144  
145  
146  
147  
148  
149  
150  
151  
152  
153  
154  
155  
156  
157  
158  
159  
160  
161  
162  
163  
164  
165  
166  
167  
168  
169  
170  
171  
172  
173  
174  
175  
176  
177  
178  
179  
180  
181  
182  
183  
184  
185  
186  
187  
188  
189  
190  
191  
192  
193  
194  
195  
196  
197  
198  
199  
200  
201  
202  
203  
204  
205  
206  
207  
208  
209  
210  
211  
212  
213  
214  
215  
216  
217  
218  
219  
220  
221  
222  
223  
224  
225  
226  
227  
228  
229  
230  
231  
232  
233  
234  
235  
236  
237  
238  
239  
240  
241  
242  
243  
244  
245  
246  
247  
248  
249  
250  
251  
252  
253  
254  
255  
256  
257  
258  
259  
260  
261  
262  
263  
264  
265  
266  
267  
268  
269  
270  
271  
272  
273  
274  
275  
276  
277  
278  
279  
280  
281  
282  
283  
284  
285  
286  
287  
288  
289  
290  
291  
292  
293  
294  
295  
296  
297  
298  
299  
300  
301  
302  
303  
304  
305  
306  
307  
308  
309  
310  
311  
312  
313  
314  
315  
316  
317  
318  
319  
320  
321  
322  
323  
324  
325  
326  
327  
328  
329  
330  
331  
332  
333  
334  
335  
336  
337  
338  
339  
340  
341  
342  
343  
344  
345  
346  
347  
348  
349  
350  
351  
352  
353  
354  
355  
356  
357  
358  
359  
360  
361  
362  
363  
364  
365  
366  
367  
368  
369  
370  
371  
372  
373  
374  
375  
376  
377  
378  
379  
380  
381  
382  
383  
384  
385  
386  
387  
388  
389  
390  
391  
392  
393  
394  
395  
396  
397  
398  
399  
400  
401  
402  
403  
404  
405  
406  
407  
408  
409  
410  
411  
412  
413  
414  
415  
416  
417  
418  
419  
420  
421  
422  
423  
424  
425  
426  
427  
428  
429  
430  
431  
432  
433  
434  
435  
436  
437  
438  
439  
440  
441  
442  
443  
444  
445  
446  
447  
448  
449  
450  
451  
452  
453  
454  
455  
456  
457  
458  
459  
460  
461  
462  
463  
464  
465  
466  
467  
468  
469  
470  
471  
472  
473  
474  
475  
476  
477  
478  
479  
480  
481  
482  
483  
484  
485  
486  
487  
488  
489  
490  
491  
492  
493  
494  
495  
496  
497  
498  
499  
500  
501  
502  
503  
504  
505  
506  
507  
508  
509  
510  
511  
512  
513  
514  
515  
516  
517  
518  
519  
520  
521  
522  
523  
524  
525  
526  
527  
528  
529  
530  
531  
532  
533  
534  
535  
536  
537  
538  
539  
540  
541  
542  
543  
544  
545  
546  
547  
548  
549  
550  
551  
552  
553  
554  
555  
556  
557  
558  
559  
560  
561  
562  
563  
564  
565  
566  
567  
568  
569  
570  
571  
572  
573  
574  
575  
576  
577  
578  
579  
580  
581  
582  
583  
584  
585  
586  
587  
588  
589  
590  
591  
592  
593  
594  
595  
596  
597  
598  
599  
600  
601  
602  
603  
604  
605  
606  
607  
608  
609  
610  
611  
612  
613  
614  
615  
616  
617  
618  
619  
620  
621  
622  
623  
624  
625  
626  
627  
628  
629  
630  
631  
632  
633  
634  
635  
636  
637  
638  
639  
640  
641  
642  
643  
644  
645  
646  
647  
648  
649  
650  
651  
652  
653  
654  
655  
656  
657  
658  
659  
660  
661  
662  
663  
664  
665  
666  
667  
668  
669  
670  
671  
672  
673  
674  
675  
676  
677  
678  
679  
680  
681  
682  
683  
684  
685  
686  
687  
688  
689  
690  
691  
692  
693  
694  
695  
696  
697  
698  
699  
700  
701  
702  
703  
704  
705  
706  
707  
708  
709  
710  
711  
712  
713  
714  
715  
716  
717  
718  
719  
720  
721  
722  
723  
724  
725  
726  
727  
728  
729  
730  
731  
732  
733  
734  
735  
736  
737  
738  
739  
740  
741  
742  
743  
744  
745  
746  
747  
748  
749  
750  
751  
752  
753  
754  
755  
756  
757  
758  
759  
760  
761  
762  
763  
764  
765  
766  
767  
768  
769  
770  
771  
772  
773  
774  
775  
776  
777  
778  
779  
780  
781  
782  
783  
784  
785  
786  
787  
788  
789  
790  
791  
792  
793  
794  
795  
796  
797  
798  
799  
800  
801  
802  
803  
804  
805  
806  
807  
808  
809  
810  
811  
812  
813  
814  
815  
816  
817  
818  
819  
820  
821  
822  
823  
824  
825  
826  
827  
828  
829  
830  
831  
832  
833  
834  
835  
836  
837  
838  
839  
840  
841  
842  
843  
844  
845  
846  
847  
848  
849  
850  
851  
852  
853  
854  
855  
856  
857  
858  
859  
860  
861  
862  
863  
864  
865  
866  
867  
868  
869  
870  
871  
872  
873  
874  
875  
876  
877  
878  
879  
880  
881  
882  
883  
884  
885  
886  
887  
888  
889  
890  
891  
892  
893  
894  
895  
896  
897  
898  
899  
900  
901  
902  
903  
904  
905  
906  
907  
908  
909  
910  
911  
912  
913  
914  
915  
916  
917  
918  
919  
920  
921  
922  
923  
924  
925  
926  
927  
928  
929  
930  
931  
932  
933  
934  
935  
936  
937  
938  
939  
940  
941  
942  
943  
944  
945  
946  
947  
948  
949  
950  
951  
952  
953  
954  
955  
956  
957  
958  
959  
960  
961  
962  
963  
964  
965  
966  
967  
968  
969  
970  
971  
972  
973  
974  
975  
976  
977  
978  
979  
980  
981  
982  
983  
984  
985  
986  
987  
988  
989  
990  
991  
992  
993  
994  
995  
996  
997  
998  
999  
1000

Keywords: HIV testing, syphilis testing, key populations, 95-95-95

## ABSTRACT

### Objectives

Key populations, including sex workers, men who have sex with men, and people who inject drugs, have a high risk of HIV and sexually transmitted infections (STIs). We assessed the health and economic impacts of different HIV and syphilis testing strategies among three key populations in Viet Nam using a dual HIV/syphilis rapid diagnostic test (RDT).

### Setting

We used the Spectrum AIDS Impact Model to simulate the HIV epidemic in key populations in Viet Nam and evaluated five testing scenarios. We used a 15-year time horizon and all costs are from the provider's perspective.

### Participants

We include the entire population of Viet Nam in the model.

### Interventions

We model five testing scenarios among key populations: 1) annual testing with an HIV rapid diagnostic test (RDT), 2) annual testing with a dual RDT, 3) biannual testing using dual RDT and HIV RDT, 4) biannual testing using HIV RDT, and 5) biannual testing using dual RDTs.

### Primary and secondary outcome measures

The primary outcome is incremental cost-effectiveness ratios (ICERS). Secondary outcomes include HIV and syphilis cases and costs for each proposed intervention.

### Results

Annual testing using a dual HIV/syphilis RDT was cost saving and averted 3,206 HIV cases and treated 7,719 syphilis cases compared to baseline over 15 years. Biannual testing using one dual test and one HIV RDT, or two dual tests both averted an additional 875 HIV cases and were cost-effective (\$1,024 and \$2,518 per DALY averted, respectively). Annual or biannual HIV testing using HIV RDTs and separate syphilis tests were more costly and less effective than using one or two dual RDTs.

1  
2 **Conclusions**

3  
4 Annual or biannual HIV and syphilis testing using dual RDTs among key populations can be cost-effective and  
5  
6 support countries in reaching global reduction goals for HIV and syphilis.  
7  
8  
9  
10  
11  
12  
13  
14  
15  
16  
17  
18  
19  
20  
21  
22  
23  
24  
25  
26  
27  
28  
29  
30  
31  
32  
33  
34  
35  
36  
37  
38  
39  
40  
41  
42  
43  
44  
45  
46  
47  
48  
49  
50  
51  
52  
53  
54  
55  
56  
57  
58  
59  
60

For peer review only

## STRENGTHS AND LIMITATIONS OF THIS STUDY

- Strength: Our model presents novel cost-effectiveness estimates for the use of dual HIV/syphilis testing in key populations that can inform health planners
- Strength: We include five testing scale up scenarios using both HIV RDT and dual HIV/syphilis RDT
- Strength: Our model is informed by demographic, behavioral, and biological data from government sources, surveys, surveillance, publicly available reports, databases, and peer-reviewed literature
- Limitation: We made some assumptions regarding the timing and uptake of HIV and syphilis testing among key populations that may be inaccurate.
- Limitation: Our model assumes that increased syphilis testing and treatment will not impact syphilis prevalence, however, it is unknown whether increased testing will reduce or increase syphilis prevalence.

## INTRODUCTION

Key populations, including people who inject drugs (PWID), men who have sex with men (MSM), sex workers (SW), and transgender populations, are at higher risk of acquiring both HIV and syphilis. HIV incidence is significantly higher among key populations in all regions compared to the general population; however, differences vary substantially by region and by key population.[1] While key populations represent 25% of new HIV cases in sub-Saharan Africa, they represent 80% of new HIV cases in the rest of the world.[2] Recent data suggests syphilis incidence, while remaining prevalent in low- and middle-income countries (LMIC), is increasing among key populations, particularly MSM.[1, 3, 4] World Health Organization (WHO) HIV testing guidelines recommend HIV retesting at least annually for key populations and more frequent testing (3-6 months) for those with high ongoing risk.[5] WHO guidelines for syphilis screening depend on population and setting. Rapid diagnostic tests (RDTs) are increasingly being used to screen for syphilis in some settings, yet laboratory-based testing remains common,[6] leaving many key populations unreached by syphilis testing. With the introduction of prequalified dual HIV/syphilis RDTs, and the recent WHO recommendation to offer dual HIV/syphilis testing in antenatal care (ANC) settings,[7] it is important to consider how further integration and expansion of dual HIV/syphilis testing could benefit key populations.

Since 2015, WHO has recommended immediate initiation of antiretroviral therapy (ART) for all people living with HIV (PLHIV) [8] and the United Nations 95-95-95 targets aim to diagnose 95% of PLHIV, provide 95% of PLHIV with ART, and ensure 95% PLHIV on ART are virally suppressed.[9] Despite progress towards these goals – in 2019 81% of PLHIV knew their HIV status and 67% were on ART – this progress is uneven; only 2/3 of key populations are aware of their HIV status.[2] While key populations lag behind the general population in all phases of testing, linkage to treatment, and viral suppression, the largest gap exists in testing.[10] WHO has also developed a global strategy on sexually transmitted infections (STIs) which aims for a 90% reduction in syphilis incidence by 2030, and for 70% of key populations to have access to STI and HIV services, including prevention, testing, and treatment.[11] Increased syphilis testing and treatment may reduce syphilis burden among key and general populations, as well as HIV incidence since early symptomatic syphilis increases risks of HIV

acquisition and transmission.[3] Currently, the frequency of syphilis testing recommended by WHO is based on local epidemics; however, the optimal frequency for syphilis testing among key populations is unknown.

In Viet Nam, the national HIV prevalence is <1% in the general population, and significantly higher in key populations, with prevalence ranging between 3-13% among PWID, MSM, and FSW. Similarly, syphilis prevalence among MSM (6.7%) and FSW (2.1%) are also higher than the general population (0.3%).[12] With budgetary constraints in HIV and STI programs, and the health sector, identifying cost-effective strategies for targeted HIV and syphilis testing among high risk groups in Viet Nam is crucial to inform policymakers seeking to optimize resource allocation to maximize population health. We modeled the health impacts and costs associated with varying frequencies of HIV and syphilis testing for key populations, using test scenarios that include a dual HIV/syphilis RDT.

## METHODS

### Settings and Populations

We modeled three key populations: MSM, PWID, and FSW (and their clients) in Viet Nam, using national level HIV prevalence and syphilis prevalence estimates for each key population (**Table 1**).

**Table 1. Model parameters for Spectrum input and cost-effectiveness analysis of HIV and syphilis testing scale up among key populations in Viet Nam.** <sup>a</sup> = 2018 Viet Nam HIV Sentinel Surveillance. <sup>b</sup> = 2019 Viet Nam HIV Sentinel Surveillance. \* = Spectrum model prior. \*\* = assumed. \*\*\* = Based on information from in-country source.

| Model parameter                   | Value |
|-----------------------------------|-------|
| HIV Prevalence                    |       |
| MSM (incl. TGW) <sup>a</sup>      | 10.8% |
| PWID <sup>b</sup>                 | 12.7% |
| FSW <sup>a</sup>                  | 3.6%  |
| Syphilis Prevalence[12]           |       |
| MSM (incl. TGW)                   | 6.7%  |
| PWID                              | 0.3%  |
| FSW                               | 2.1%  |
| Baseline syphilis test acceptance |       |
| MSM (incl. TGW)[45],[46],[14]     | 27%   |
| PWID[15]                          | 16%   |
| FSW[16],[47]                      | 35%   |

|    |                                         |             |
|----|-----------------------------------------|-------------|
| 1  | Syphilis DALYs averted[48]              |             |
| 2  |                                         |             |
| 3  | DALYs averted per syphilis case treated | 0.04        |
| 4  | ART                                     |             |
| 5  | 2019 Coverage***                        | 70%         |
| 6  | Annual Scale-Up**                       | 4.8%        |
| 7  | Transmission Reduction Efficacy*        | 70%         |
| 8  | Mortality Reduction Efficacy*           | 80%         |
| 9  |                                         |             |
| 10 |                                         |             |
| 11 | Other Prevention                        |             |
| 12 | Condom Use**                            | 50%         |
| 13 | Condom Efficacy*                        | 80%         |
| 14 | PrEP Coverage (MSM incl. TGW)**         | 5%          |
| 15 | PrEP Efficacy*                          | 90%         |
| 16 | PrEP Adherence*                         | 80%         |
| 17 |                                         |             |
| 18 |                                         |             |
| 19 | Costs***                                |             |
| 20 | HIV Lay Test†                           | \$4.50      |
| 21 | Syphilis RPR†                           | \$6.28      |
| 22 | HIV/Syphilis Dual Test†                 | \$6.50      |
| 23 | ART‡                                    | \$285       |
| 24 | Syphilis Treatment                      | \$6.50      |
| 25 | Time Horizon                            | 2020 - 2035 |
| 26 | Discount Rate                           | 3%          |
| 27 |                                         |             |
| 28 |                                         |             |

129 † Testing costs include labor, incentives, travel costs, and test kits. Primary cost driver between tests is the cost of the test kit.

130 ‡ ART cost includes labor, laboratory monitoring costs, ARVs, and other recurring costs.

131 \* MSM=men who have sex with men, FSW=female sex workers, PWID=people who inject drugs, TGW=transgender women,  
132 ART=antiretroviral therapy, PrEP=pre-exposure prophylaxis, syphilis RPR=syphilis rapid plasma regain.

133  
134

## 135 Model

136  
137 We used a deterministic, compartmental model to simulate the HIV epidemic in key populations from 2020-2035  
138 using the AIDS Impact Model within the Spectrum software package (v 5.76). The model estimates annual HIV  
139 incidence, AIDS mortality, and disability. We simulated the impact of increasing HIV testing frequency using the  
140 Goals model within Spectrum, as previously described.[13] Briefly, the model is age- and sex-stratified with  
141 compartments for MSM, PWID, FSW and their clients, and low- and medium-risk heterosexuals.<sup>1</sup> The model was  
142 parameterized with demographic, behavioral, and biological data from government sources, surveys, surveillance,  
143 publicly available reports, databases, and peer-reviewed literature. To estimate syphilis burden, we used  
144  
145  
146  
147  
148  
149  
150  
151  
152  
153  
154  
155

156 <sup>1</sup> Low-risk heterosexuals are those in stable couples while medium-risk heterosexuals are those that engage in casual sex but are not  
157 in a high-risk group (high risk groups: MSM, FSW, PWID).

158  
159  
160

population size estimates from the Goals model and population-specific estimates of prevalence;<sup>[12]</sup> we estimate the number of persons tested positive and treated for syphilis infection under each scenario. This model assumes that syphilis testing and treatment does not impact syphilis prevalence. For both HIV and syphilis, disability-adjusted life years (DALYs) are calculated for each scenario. Model key parameters are shown in **Table 1**.

### Costs

Cost inputs include cost per HIV test, initial syphilis test (rapid plasma reagin (RPR)), and the dual HIV/syphilis RDT. We used local data on the personnel, commodities, and transport costs associated with lay testing and estimate costs (**Table 1**). ART costs include personnel, commodities, clinical follow-up, and laboratory monitoring. This analysis includes the costs of intervention delivery and treatment (penicillin and ART) but does not consider additional averted sequelae costs such as the treatment of opportunistic infections due to uncontrolled HIV. All costs are from the provider's perspective and reported in 2019 US dollars.

### Scenarios

Our baseline scenario estimates annual HIV testing based on current WHO recommendations,<sup>[5]</sup> and syphilis testing based on observed uptake. In the baseline scenario, we assume 50% of individuals in key populations test annually for HIV, and syphilis testing with RPR occurs at rates specific to each key population (**Table 2**).<sup>[14–16]</sup> We considered alternative scenarios with varying testing frequency and test type (separate HIV and syphilis RPR, or a combined dual syphilis/HIV RDT) among key populations from 2020 to 2035. Scenarios modeled include: **1)** annual HIV testing with RDT and baseline syphilis RPR testing, **2)** annual testing with dual RDT, **3)** biannual testing (2 times per year), first with dual RDT and then with HIV RDT, **4)** biannual HIV testing with RDT and baseline syphilis RPR testing, and **5)** biannual testing with dual RDT (**Table 2**). We assumed 75% test acceptance for the first test in all scenarios except baseline, and 90% of those who accepted the first test would accept the second test in all scenarios that include biannual testing.

**Table 2: HIV/syphilis testing scenarios among key populations in Viet Nam.** The table cells show the proportion of key populations in Viet Nam that receive each test per year. If not specified, the proportion refers to all key populations.

| Scenario                                   | Proportion of key population receiving HIV or syphilis testing per year |             |                                     |                  |
|--------------------------------------------|-------------------------------------------------------------------------|-------------|-------------------------------------|------------------|
|                                            | 1 HIV test                                                              | 2 HIV tests | 1 syphilis test                     | 2 syphilis tests |
| Baseline                                   | 50%                                                                     | -           | 35% (FSW), 27% (MSM),<br>16% (PWID) | -                |
| 1. One HIV RDT                             | 75%                                                                     | -           | 35% (FSW), 27% (MSM),<br>16% (PWID) | -                |
| 2. One Dual HIV/syphilis RDT               | 75%                                                                     |             | 75%                                 | -                |
| 3. One HIV RDT & One Dual HIV/syphilis RDT | 75%                                                                     | 68%         | 75%                                 | -                |
| 4. Two HIV RDTs                            | 75%                                                                     | 68%         | 35% (FSW), 27% (MSM),<br>16% (PWID) | -                |
| 5. Two Dual HIV/syphilis RDT               | 75%                                                                     | 68%         | 75%                                 | 68%              |

\* MSM=men who have sex with men, FSW=female sex workers, PWID=people who inject drugs, RDT=rapid diagnostic test.

We modeled increases in testing coverage by adjusting the percent of adults living with HIV (PLWH) on ART. The baseline scenario assumes 95% ART coverage among PLWH by 2028 (4.8% increase per year) based on recent ART scale-up in Viet Nam; test coverage increases by 6.0% per year with annual HIV testing (HIV RDT or dual RDT), and by 7.2% per year with biannual testing. Maximum test coverage is 95% for each model. All models assume ART coverage of 66% of men and 72% of women living with HIV in 2020 based on estimates from the Viet Nam HIV-AIDS Technical Working Group (TWG). We assume universal treatment among those who test positive for syphilis, individuals treated cannot become re-infected within the same year,[17] and no changes to syphilis prevalence under test case scenarios.

### Cost-Effectiveness

Health impact was measured in DALYs averted, HIV infections averted, syphilis infections treated, and AIDS-related deaths averted over the 15-year time horizon. This time horizon was chosen because it reflects current HIV program planning in Viet Nam. Costs and health benefits were discounted at 3% annually per standard health economic evaluations. Incremental costs were calculated as costs incurred and averted by the testing strategy. We

utilized WHO guidelines for cost-effectiveness threshold: less than gross domestic product (GDP) per capita is considered cost-effective in Viet Nam (\$2,715 USD in 2019).[18]

### Model calibration and sensitivity analyses

Models were calibrated to national HIV prevalence estimates for each key population. Monte Carlo sensitivity analyses were conducted to evaluate robustness of results to changes in: HIV and syphilis testing coverage, scenario program uptake rate, HIV and syphilis testing cost, HIV and syphilis treatment cost, average years on ART, and time horizon. **Table S1** shows the model parameters, ranges, and distributions used in the sensitivity analysis.

### Patient and public involvement

It was not appropriate or possible to involve patients or the public in the design, conduct, reporting, or dissemination plans of our research.

### Ethics approval

This study did not receive nor require ethics approval as it does not involve human or animal participants.

## RESULTS

Increasing annual HIV test coverage from 50% (baseline) to 75% using an HIV RDT (scenario 1) or a dual RDT (scenario 2) is projected to avert 3,206 HIV infections and 660 AIDS-related deaths by 2035 in Viet Nam (**Table 3**). Annual testing using dual RDT led to treatment of an additional 7,719 syphilis cases over 15 years compared to using HIV RDT, but the number of HIV infections averted was the same. HIV testing with either HIV or dual RDT biannually (scenarios 3, 4, & 5) was projected to avert an additional 875 HIV infections and 183 AIDS-related deaths by 2035 compared to annual testing. Testing using a dual HIV/syphilis RDT biannually among key populations is projected to lead to an additional 124,460 syphilis cases treated by 2035, compared to annual testing using a dual RDT (116,680 total syphilis cases treated).

**Table 3. Estimated HIV and syphilis infections, and cost-effectiveness of increased HIV and Dual HIV/syphilis testing among key populations in Viet Nam from 2020-2035.** Each scenario refers to the number of tests per year. The baseline scenario assumes that 50% of key populations are tested for HIV each year and syphilis testing rates are specific to each sub-population (FSW, MSM, and PWID). Scenarios including one test per year assume a 75% test acceptance rate, and those that include two tests per year assume a 75% test acceptance rate for the first test, and a 68.5% test acceptance rate for the second test. *Incremental cases averted*, *Total DALYs averted*, and *ICERs* compare each scenario to the previous one.

|                                      |                        | Scenario     |                    |              |                |              |              |
|--------------------------------------|------------------------|--------------|--------------------|--------------|----------------|--------------|--------------|
|                                      |                        | Baseline     | 1 Dual Test        | 1 HIV Test   | 1 HIV & 1 Dual | 2 HIV Tests  | 2 Dual Tests |
| HIV                                  | New HIV infections     | 57,902       | 54,696             | 54,696       | 53,821         | 53,821       | 53,821       |
|                                      | AIDS deaths            | 13,877       | 13,217             | 13,217       | 13,034         | 13,034       | 13,034       |
|                                      | Total HIV DALYs        | 174,567,240  | 174,508,007        | 174,508,007  | 174,490,608    | 174,490,608  | 174,490,608  |
| Syphilis                             | Total cases treated    | 108,901      | 116,680            | 108,901      | 116,680        | 108,901      | 233,361      |
|                                      | Total DALYs treated    | 3,466        | 3,713              | 3,466        | 3,713          | 3,466        | 7,426        |
| Incremental cases averted            | HIV infections averted | -            | 3,206              | 0            | 875            | 0            | 0            |
|                                      | HIV DALYs averted      | -            | 59,233             | 0            | 17,399         | 0            | 0            |
|                                      | Syphilis cases treated | -            | 7,779              | -7,779       | 7,779          | -7,779       | 124,460      |
|                                      | Syphilis DALYs averted | -            | 248                | -248         | 248            | -248         | 7,426        |
| Total DALYs averted (HIV & Syphilis) |                        | -            | -                  | 59,481       | -248           | 17,647       | -248         |
| Costs (USD)                          | Net Costs              | \$34,795,660 | \$30,123,774       | \$36,853,771 | \$47,943,060   | \$54,673,057 | \$57,292,031 |
|                                      | HIV testing            | \$16,491,955 | -                  | \$24,683,204 | \$19,677,541   | \$44,360,744 | -            |
|                                      | HIV treatment averted  | -            | -\$6,133,138       | -\$6,133,138 | -\$7,991,393   | -\$7,991,393 | -\$7,991,393 |
|                                      | Syphilis testing       | \$17,740,540 | -                  | \$17,740,540 | -              | \$17,740,540 | -            |
|                                      | Syphilis treatment     | \$563,165    | \$603,395          | \$563,165    | \$603,395      | \$563,165    | \$1,206,793  |
|                                      | Dual testing           | -            | \$35,653,516       | -            | \$35,653,516   | -            | \$64,076,631 |
| Total incremental costs              |                        | -            | -\$4,671,887       | \$6,729,997  | \$11,089,289   | \$6,729,997  | \$2,618,974  |
| ICERs (cost per DALY averted)        |                        | -            | <b>Cost-saving</b> | <i>Dom</i>   | \$1,024        | <i>Dom</i>   | \$2,518      |

\*DALY=disability adjusted life-years, USD=United States dollars, ICERs=incremental cost-effectiveness ratios, FSW=female sex workers, MSM=men who have sex with men, PWID=people who inject drugs

1  
2  
3  
4 213 The most effective strategy was biannual testing with the dual RDT, which was projected to avert 4,081  
5  
6 214 HIV infections (7% of total infections), 76,632 HIV DALYs (0.04% of total HIV DALYs), and treat  
7  
8 215 124,460 cases of syphilis by 2035 compared to the baseline scenario. The discounted cost of implementing  
9  
10  
11 216 this scenario over 30 years is \$57.3 million USD compared to \$34.8 million USD for the baseline scenario.  
12  
13 217 The testing cost of implementing biannual testing using the dual RDT is almost four times the cost of  
14  
15 218 baseline testing with an HIV RDT (\$64.1 million vs. \$16.5 million, respectively), but an estimated \$8.0  
16  
17 219 million USD in HIV treatment costs would be saved by biannual HIV testing, and \$17.7 million USD in  
18  
19  
20 220 syphilis testing costs would be averted by using the dual RDT. The cost of biannual testing with an HIV  
21  
22 221 RDT and continuing to test for syphilis with RPR is slightly higher than biannual testing with the dual  
23  
24 222 RDT (\$57.3 vs. \$54.7 million USD, respectively), but the latter strategy treats an estimated 124,000 more  
25  
26  
27 223 cases of syphilis over 15 years.

28  
29  
30 224 Annual testing with the dual RDT is cost saving compared to the baseline scenario (**Figure 1**). Annual  
31  
32 225 HIV testing with RDT is more expensive and averts fewer DALYs than with the dual RDT (strongly  
33  
34 226 dominated). The next most efficient scenario is biannual testing using one dual RDT and one HIV RDT,  
35  
36 227 which is cost-effective (\$1,024 USD per DALY averted). Biannual testing with the dual RDT is also cost-  
37  
38  
39 228 effective (\$2,518 USD per DALY averted) and more cost-effective than using the HIV RDT (weakly  
40  
41 229 dominated). Despite slightly higher initial costs, the discounted cost of annual testing with a dual RDT  
42  
43 230 becomes less than that of current testing within two years, due to decreased ART costs associated with  
44  
45  
46 231 HIV averted (**Figure S1**).

47  
48  
49 232 Sensitivity analyses including all scenarios found that an annual dual RDT (scenario 2) is cost-saving in  
50  
51 233 59% of the simulations and either cost-saving or cost-effective (at \$2,715 per DALY averted) in all  
52  
53 234 simulations (**Table S2**). In non-dominated scenarios (scenarios 2, 3, and 5), using dual RDT annually or  
54  
55 235 biannually was cost-effective or cost-saving in most simulations, while biannual testing with one dual  
56  
57  
58  
59

1  
2  
3 236 RDT and one HIV RDT was cost-saving in only 31% of simulations (**Figure 2**). In univariate sensitivity  
4  
5 237 analysis adjusting costs, our scenarios that involve one dual RDT (scenarios 2 and 3) remain cost-effective  
6  
7  
8 238 even after all costs (testing and treatment) are increased by 50%. In this sensitivity analysis, biannual dual  
9  
10 239 testing is no longer cost-effective (\$3,777 per DALY averted).  
11  
12

13 240

14

## 15 241 **DISCUSSION**

16

17

18 242 In our model, we found that implementing annual testing with the dual RDT at 75% coverage was cost-  
19  
20 243 saving, averted more HIV infections, and treated more syphilis cases compared to annual testing using  
21  
22  
23 244 HIV RDT at 50% coverage and current syphilis testing in Viet Nam. While biannual testing with one dual  
24  
25 245 RDT and one HIV RDT was projected to be more costly, it would avert more HIV and syphilis related  
26  
27 246 DALYs and using dual RDT for both tests would avert additional DALYs attributed to syphilis. Increasing  
28  
29  
30 247 the frequency of HIV testing to one or two tests per year using only HIV RDTs, while continuing to test  
31  
32 248 for syphilis using RPR, was not efficient compared to other strategies.  
33

34

35 249 Implementing biannual testing substantially increases testing costs, but also prevents more HIV infections,  
36  
37 250 therefore averting more ART-related costs. Increasing test frequency may be cost-saving or cost-effective  
38  
39 251 although it incurs considerable costs in the near term while costs averted may not be observed for many  
40  
41  
42 252 years. Annual testing using a dual RDT can help offset some near-term costs as it is less expensive than  
43  
44 253 using HIV RDT and syphilis RPR. Policymakers must weigh the health impact and cost-effectiveness of  
45  
46 254 different testing scenarios over time against current affordability given HIV and syphilis testing budgets;  
47  
48 255 however, using the dual RDT will help integrate syphilis testing within existing HIV testing programs,  
49  
50  
51 256 improving program efficiencies.[19]

52

53  
54 257 Implementation of dual RDT is occurring in some settings; preliminary reports indicate that 48% of  
55  
56 258 countries use dual RDT in ANC, and 25% use dual RDT in key populations, although the extent of this  
57

58

59

60

1  
2  
3 259 use is unknown (WHO HIV Testing Services, 2021). PEPFAR and the Global Fund cover dual RDT in  
4  
5  
6 260 ANC,[20] and there are multiple dual RDTs qualified by the Global Fund and WHO.[21] The use of dual  
7  
8 261 RDT during ANC could be a model for improving HIV/STI integration among those at high risk for both  
9  
10 262 HIV and syphilis, such as key populations, however, there are multiple operational challenges associated  
11  
12  
13 263 with using dual tests, namely that of integrating HIV and STI programs.[22]

14  
15 264 Benefits of the dual test are its cost-effectiveness and potential to reach more at-risk individuals. Annual  
16  
17  
18 265 or biannual testing can enable earlier identification of HIV-positive individuals for faster ART initiation  
19  
20 266 and prevention of onward transmission. Annual HIV testing for key populations is recommended by  
21  
22 267 WHO, and more frequent testing (every 3-6 months) may be advised for those with individual risk factors,  
23  
24  
25 268 including those using pre-exposure prophylaxis (PrEP) and key populations presenting with STIs.[23]  
26  
27 269 Individuals presenting with syphilis symptoms should also test for HIV, and using the dual RDT is less  
28  
29 270 costly as compared to a syphilis RPR and HIV RDT. As policy makers scale up PrEP among key  
30  
31  
32 271 populations in Viet Nam, including at least one dual RDT in the testing algorithm may be more cost-  
33  
34 272 effective than using HIV RDTs alone. In addition, using dual RDT tests can facilitate lay providers to  
35  
36 273 offer both HIV and syphilis testing for their community.[24]

37  
38  
39 274 Our results were robust to sensitivity analyses, suggesting that testing annually or biannually using dual  
40  
41 275 RDTs remains cost-effective if testing costs increase and HIV prevalence decreases. In scenarios  
42  
43  
44 276 involving dual RDT, the majority (>98%) of benefits, as measured in DALYs, come from averting HIV  
45  
46 277 infections rather than treating syphilis due to the relatively larger burden of disease from HIV than  
47  
48 278 syphilis. However, since the cost of a dual RDT is only slightly higher than the cost of an HIV RDT, it is  
49  
50 279 cheaper to use a dual RDT than separate HIV RDT and syphilis RPR tests.

51  
52  
53 280 Increased HIV testing can reduce HIV-associated morbidity and mortality and transmission from PLHIV  
54  
55  
56 281 through early detection and initiation of ART. While models suggest high ART coverage would result in

1  
2  
3 282 substantial declines in HIV incidence,[25, 26] empiric data from countries with population-level viral  
4  
5 283 suppression exceeding 73% (e.g. Australia, eSwatini, and Thailand) have observed less significant  
6  
7  
8 284 reductions in HIV incidence relative to predictions from mathematical models.[27] Similarly, when high  
9  
10 285 ART coverage was achieved in a series of cluster-randomized trials in sub-Saharan Africa, it resulted in  
11  
12 286 decreased population-level HIV incidence; however, this decrease was insufficient to end HIV as a public  
13  
14  
15 287 health threat.[28–31] These discrepancies may be attributed to delayed diagnosis and ART initiation  
16  
17 288 following infection,[32, 33] and gaps in the 95-95-95 targets for some population groups, for example  
18  
19 289 young men and key populations. More frequent HIV testing strategies could increase earlier diagnosis and  
20  
21  
22 290 initiation on ART, and focusing testing and linkage efforts on key populations could reduce the access  
23  
24 291 and coverage disparities in these groups. However, more frequent testing will also increase program costs,  
25  
26 292 not only through additional commodity procurement, but also for health systems, program coordination,  
27  
28  
29 293 and outreach. In settings of concentrated HIV epidemics, health planners may benefit from targeting  
30  
31 294 limited testing resources towards high-risk groups such as key populations.  
32

33  
34 295 Dual RDTs may also increase syphilis testing frequency and coverage among key populations who are  
35  
36 296 more likely to access HIV testing. Previous research has shown that coupling rapid syphilis testing in  
37  
38 297 ANC may also increase HIV test coverage in LMICs, particularly in settings where HIV test coverage is  
39  
40  
41 298 low.[34] This strategy may be similarly effective at increasing test coverage for both diseases among key  
42  
43 299 populations, as well as augment current ANC testing by reaching women in key populations who present  
44  
45 300 late or are missed by ANC services. While there is a lack of data on dual RDTs among key populations,  
46  
47 301 models of dual RDT during ANC have been shown to be cost-saving or cost-effective among both key  
48  
49  
50 302 populations and the general population of pregnant women.[7, 35] While dual RDTs are likely more  
51  
52 303 effective in the context of ANC since testing can avert more adverse outcomes associated with congenital  
53  
54  
55  
56  
57  
58  
59

1  
2  
3 304 syphilis and mother-to-child HIV transmission, we find dual RDTs may also be cost-effective among non-  
4  
5 305 pregnant key populations.  
6  
7

8 306 Our results are consistent with previously published models that show expanded testing and early access  
9  
10  
11 307 to ART for key populations in Viet Nam will cost-effectively reduce the country's HIV burden.[36, 37]  
12  
13 308 Additionally, models from both low- and high-resource countries suggest HIV testing every 3-6 months  
14  
15 309 among key populations can be cost-effective in concentrated epidemics.[38][39] However, HIV risk  
16  
17 310 within key populations is not homogenous; further targeting of higher-risk groups within key populations  
18  
19  
20 311 may be needed to achieve efficient testing regimens. While we examine the impact of increased testing  
21  
22 312 frequency among key populations as a whole, previous research has described the benefits of targeting  
23  
24 313 high-risk groups within key populations.[40] Individuals who engage in risky behaviors, such as those  
25  
26  
27 314 with more sexual partners, practicing unprotected sex, or needle sharing may benefit from additional  
28  
29 315 testing or linkage to HIV prevention such as PrEP. Further research is needed on the optimal testing  
30  
31 316 intervals for higher-risk groups of key populations.  
32  
33

34 317 Approximately one-third of key populations are not aware of their HIV status. Programs focusing on HIV  
35  
36 318 testing and treatment among FSW and PWID in Viet Nam have shown success in reducing HIV  
37  
38  
39 319 prevalence; however, less than a third of MSM reported testing for HIV in 2015, likely contributing to  
40  
41 320 increases in HIV prevalence among MSM in the past decade.[41] Annual syphilis testing among key  
42  
43 321 populations in Viet Nam is similarly low, ranging from 16% among PWID to 36% among FSW. [14–16]  
44  
45  
46 322 Due to high dual prevalence of HIV and syphilis among key populations, dual testing is a promising  
47  
48 323 strategy to increase testing coverage and linkage to care.  
49

50  
51 324 Our analysis has several limitations. We did not include the cost of scaling-up and training providers in  
52  
53 325 administering dual RDTs. However, RDT are easy to use and can be administered by a lay provider, and  
54  
55 326 rapid results can minimize loss to follow-up. Overall, dual RDTs have been shown to have adequate  
56  
57  
58  
59  
60

1  
2  
3 327 performance in field settings in Viet Nam among key populations.[42] Dual RDTs may also increase HIV  
4  
5 328 test coverage as they can be easily conducted by community health workers outside of healthcare settings,  
6  
7  
8 329 and they may be more acceptable to some members of key populations who are concerned about stigma  
9  
10 330 associated with testing.[43] Despite this, some additional training, supervision, and support will be needed  
11  
12 331 to scale-up dual RDT use among key populations.  
13  
14

15 332 Some model assumptions regarding the timing of HIV and syphilis testing may be inaccurate. We assumed  
16  
17 333 in scenarios that included a dual RDT, additional syphilis RPR tests would not be conducted. PLWH who  
18  
19  
20 334 know their status and present for syphilis screening do not need an HIV test. We assume regular testing  
21  
22 335 intervals for the entire population in each scenario, but it is possible people who engage in risky behaviors  
23  
24 336 or experience symptoms may seek more frequent retesting than biannually. We did not include the  
25  
26  
27 337 increased costs of outreach to achieve increased test coverage of key populations. Considerable  
28  
29 338 expansions of first time testing among MSM in Viet Nam have recently been achieved through social  
30  
31 339 media campaigns, perhaps providing a guide for cost-effectively increasing testing uptake among key  
32  
33 340 populations.[41, 44] We also did not consider the burden that increasing the testing coverage and  
34  
35  
36 341 frequency may have on the health system; however, as testing may be conducted effectively using lay  
37  
38 342 providers, increased testing may not substantially impact the provision of other services.[43] Although  
39  
40  
41 343 targeting key populations in lower prevalence regions may be more difficult and costly, these results are  
42  
43 344 robust to increased costs and it will likely remain an effective use of resources. We assume that syphilis  
44  
45 345 screening will not impact syphilis prevalence rates. Increased screening may reduce prevalence by  
46  
47 346 increasing early treatment, but syphilis screening also has the potential to increase prevalence as  
48  
49  
50 347 individuals with latent syphilis are unlikely to transmit the infection to others unless they are treated and  
51  
52 348 then infected again. Finally, there is limited data on population size, HIV and syphilis prevalence, and  
53  
54  
55  
56  
57  
58  
59

1  
2  
3 349 health seeking behaviors among key populations. We based our model input on estimates included in  
4  
5  
6 350 published literature as well as Viet Nam country sources.  
7

8 351 Since data on the impact of retesting on population HIV incidence is limited, we made conservative  
9  
10  
11 352 assumptions about the frequency of linkage to care and ART use following retesting. We assumed that  
12  
13 353 HIV testing frequency would increase in Viet Nam among key populations in the baseline scenario but  
14  
15 354 testing frequency would increase more quickly under the other scenarios. Because of this, we believe our  
16  
17  
18 355 estimates of the impact of increased testing frequency are conservative.  
19

20 356 Our study suggests that annual or biannual HIV and syphilis testing among key populations in Viet Nam  
21  
22  
23 357 using a dual RDT will increase HIV and syphilis detection and treatment, while remaining cost-saving or  
24  
25 358 cost-effective. Integrating HIV and other STI testing can streamline services as well as expand testing and  
26  
27 359 help countries with epidemics concentrated in key populations reach 95-95-95 targets.  
28  
29

### 30 360

### 31

### 32 361 **COMPETING INTERESTS**

### 33

34  
35 362 The authors declare no competing interests.  
36

### 37 363 **FUNDING SOURCE**

### 38

39 364 WHO-USAID: GHA-G-00-09-00003; NIH/NIAID: K01 AI116298  
40

### 41 42 365 **CONTRIBUTORSHIP STATEMENT**

### 43

44 366 CJ and AD devised the project and the main conceptual ideas. DC, DG, and RB parameterized the model.  
45  
46 367 DC and DG carried out the model implementation. VH and SVH provided model feedback. All authors  
47  
48 368 provided critical feedback and helped shape the research, analysis, and manuscript.  
49

### 50 51 369 **DATA SHARING STATEMENT**

### 52

53 370 Extra data is available by emailing David Coomes, dcoomes@uw.edu  
54  
55  
56  
57  
58  
59  
60

**References**

- 1  
2  
3 371  
4  
5 372 [1] UNAIDS Joint United Nations Programme on HIV/AIDS. *Global AIDS update 2019 - Communities*  
6 *at the centre*. Geneva, <https://www.unaids.org/en/resources/documents/2019/2019-global->  
7 373 <https://www.unaids.org/en/resources/documents/2019/2019-global->  
8 AIDS-update (2019).  
9 374  
10  
11 375 [2] UNAIDS Joint United Nations Programme on HIV/AIDS. *Global AIDS Update 2020: Seizing the*  
12 *moment*. Geneva, <https://www.unaids.org/en/resources/documents/2020/global-aids-report>  
13 376 <https://www.unaids.org/en/resources/documents/2020/global-aids-report>  
14 (2020).  
15 377  
16  
17 378 [3] Cameron CE. Syphilis Vaccine Development: Requirements, Challenges, and Opportunities. *Sex*  
18 *Transm Dis* 2018; 45: S17.  
19 379  
20  
21 380 [4] Tsuboi M, Evans J, Davies E, et al. Prevalence of syphilis among men who have sex with men: A  
22 380 global systematic review and meta-analysis from 2000 to 2020. *Lancet Glob Heal*; In press.  
23 381  
24 381  
25  
26 382 [5] World Health Organization. *Consolidated guidelines on HIV testing services*. Geneva,  
27 <https://www.ncbi.nlm.nih.gov/books/NBK316021/> (2015).  
28 383  
29  
30 384 [6] World Health Organization. *WHO Guideline on Syphilis screening and treatment for pregnant*  
31 *women*, [https://www.who.int/reproductivehealth/publications/rtis/syphilis-ANC-](https://www.who.int/reproductivehealth/publications/rtis/syphilis-ANC-screenandtreat-guidelines/en/)  
32 385 [https://www.who.int/reproductivehealth/publications/rtis/syphilis-ANC-](https://www.who.int/reproductivehealth/publications/rtis/syphilis-ANC-screenandtreat-guidelines/en/)  
33 screenandtreat-guidelines/en/ (2017).  
34 386  
35  
36 387 [7] Rodriguez P, Roberts DA, Meisner J, et al. Cost-effectiveness of dual maternal HIV and syphilis  
37 387 testing strategies in high and low HIV prevalence countries: a modeling study. *Lancet Glob Heal*  
38 388 2021; 9: E61–E71.  
39 389  
40 389  
41  
42 390 [8] World Health Organization. *Consolidated Guidelines on the Use of Antiretroviral Drugs for*  
43 390 *Treating and Preventing HIV Infection*. 2016. Epub ahead of print 2016. DOI:  
44 391 10.1017/CBO9781107415324.004.  
45 391  
46 392  
47  
48 393 [9] UNAIDS. *90-90-90 An ambitious treatment target to help end the AIDS epidemic*,  
49 393 <https://www.unaids.org/en/resources/909090> (2016).  
50 394  
51 394  
52  
53 395 [10] Hakim AJ, MacDonald V, Hladik W, et al. Gaps and opportunities: measuring the key population  
54 395 cascade through surveys and services to guide the HIV response. *J Int AIDS Soc* 2018; 21:  
55 396  
56  
57  
58  
59  
60

1  
2  
3  
4  
5  
6  
7  
8  
9  
10  
11  
12  
13  
14  
15  
16  
17  
18  
19  
20  
21  
22  
23  
24  
25  
26  
27  
28  
29  
30  
31  
32  
33  
34  
35  
36  
37  
38  
39  
40  
41  
42  
43  
44  
45  
46  
47  
48  
49  
50  
51  
52  
53  
54  
55  
56  
57  
58  
59  
60

397 e25119.

- [11] World Health Organization. *Global Health Sector Strategy on Sexually Transmitted Infections 2016-2021*, <https://www.who.int/reproductivehealth/publications/rtis/ghss-stis/en/> (2016).
- [12] World Health Organization. Global Health Observatory data repository: Data on syphilis, <https://apps.who.int/gho/data/node.main.A1357STI?lang=en> (accessed 4 June 2020).
- [13] Stover J, Brown T, Puckett R, et al. Updates to the Spectrum/Estimations and Projections Package model for estimating trends and current values for key HIV indicators. *AIDS* 2017; 31: S5–S11.
- [14] Justumus P, Colby D, Mai Doan Anh T, et al. Willingness to use the Internet to seek information on HIV prevention and care among men who have sex with men in Ho Chi Minh City, Vietnam. *PLoS One* 2013; 8: e71471.
- [15] Nguyen TA, Hoang LT, Pham VQ, et al. Risk factors for HIV-1 seropositivity in drug users under 30 years old in Haiphong, Vietnam. *Addiction* 2001; 96: 405–413.
- [16] Ngo AD, Ratliff EA, Mccurdy SA, et al. Health-seeking behaviour for sexually transmitted infections and HIV testing among female sex workers in Vietnam. *AIDS Care - Psychol Socio-Medical Asp AIDS/HIV* 2007; 19: 878–887.
- [17] Feldman J, Mishra S. What could re-infection tell us about R0? A modeling case-study of syphilis transmission. *Infect Dis Model* 2019; 4: 257–264.
- [18] World Bank. World Bank Data: GDP per capita (current US\$) - Vietnam, <https://data.worldbank.org/indicator/NY.GDP.PCAP.CD?locations=VN> (accessed 16 December 2020).
- [19] Ong JJ, Fu H, Smith MK, et al. Expanding syphilis testing: a scoping review of syphilis testing interventions among key populations. *Expert Rev Anti Infect Ther* 2018; 16: 423–432.
- [20] U.S. President’s Emergency Plan for AIDS Relief (PEPFAR). *PEPFAR 2021 Country and Regional Operational Plan (COP/ROP) Guidance for all PEPFAR Countries*, <https://www.state.gov/wp-content/uploads/2020/12/PEPFAR-COP21-Guidance-Final.pdf> (2021).

- 1  
2  
3 423 [21] The Global Fund. *List of HIV Diagnostic test kits and equipments classified according to the*  
4 *Global Fund Quality Assurance Policy*,  
5 424 *https://www.theglobalfund.org/media/5878/psm\_productshiv-who\_list\_en.pdf* (2021).  
6  
7 425  
8  
9 426 [22] Broyles LN, Boeras D, Peeling RW. Implementation of dual maternal HIV-Syphilis testing: The  
10 *devil is in the details. Lancet Glob Heal* 2021; 9: e595.  
11 427  
12  
13 428 [23] World Health Organization. *Consolidated guidelines on HIV testing services*. Geneva,  
14 *https://www.who.int/publications/i/item/978-92-4-155058-1* (2019).  
15 429  
16  
17  
18 430 [24] Nguyen V, Anh L, Thong N, et al. High prevalence of HIV, syphilis and HCV among key  
19 *populations and partners: results from an integrated multiple diseases testing led by community*  
20 *in Viet Nam. In: Poster exhibition IAS 2019. Mexico City, Mexico, 2019.*  
21  
22 432  
23  
24 433 [25] Granich RM, Gilks CF, Dye C, et al. Universal voluntary HIV testing with immediate antiretroviral  
25 *therapy as a strategy for elimination of HIV transmission: a mathematical model. Lancet* 2009;  
26 434 *373: 48–57.*  
27  
28 435  
29  
30 436 [26] Eaton JW, Johnson LF, Salomon JA, et al. HIV treatment as prevention: Systematic comparison of  
31 *mathematical models of the potential impact of antiretroviral therapy on HIV incidence in South*  
32 437 *Africa. PLoS Med*; 9. Epub ahead of print July 2012. DOI: 10.1371/journal.pmed.1001245.  
33  
34 438  
35  
36 439 [27] UNAIDS. AIDSinfo | UNAIDS, *https://aidsinfo.unaids.org/* (accessed 27 May 2020).  
37  
38  
39 440 [28] Iwuji CC, Orne-Gliemann J, Larmarange J, et al. Universal test and treat and the HIV epidemic in  
40 *rural South Africa: a phase 4, open-label, community cluster randomised trial. Lancet HIV* 2018;  
41 441 *5: e116–e125.*  
42  
43 442  
44  
45 443 [29] Makhema J, Wirth KE, Pretorius Holme M, et al. Universal Testing, Expanded Treatment, and  
46 *Incidence of HIV Infection in Botswana. N Engl J Med* 2019; 381: 230–242.  
47 444  
48  
49 445 [30] Havlir D V., Balzer LB, Charlebois ED, et al. HIV Testing and Treatment with the Use of a  
50 *Community Health Approach in Rural Africa. N Engl J Med* 2019; 381: 219–229.  
51 446  
52  
53 447 [31] Hayes RJ, Donnell D, Floyd S, et al. Effect of Universal Testing and Treatment on HIV Incidence —  
54 *HPTN 071 (PopART). N Engl J Med* 2019; 381: 207–218.  
55 448  
56  
57  
58  
59  
60

- 1  
2  
3 449 [32] Akullian A, Bershteyn A, Jewell B, et al. The missing 27%. *AIDS* 2017; 31: 2427–2429.  
4  
5  
6 450 [33] Abdool Karim SS. HIV-1 Epidemic Control — Insights from Test-and-Treat Trials. *N Engl J Med*  
7  
8 451 2019; 381: 286–288.  
9  
10 452 [34] Swartzendruber A, Steiner RJ, Adler MR, et al. Introduction of rapid syphilis testing in antenatal  
11  
12 453 care: A systematic review of the impact on HIV and syphilis testing uptake and coverage. *Int J*  
13  
14 454 *Gynecol Obstet* 2015; 130: S15–S21.  
15  
16 455 [35] Gliddon HD, Peeling RW, Kamb ML, et al. A systematic review and meta-analysis of studies  
17  
18 456 evaluating the performance and operational characteristics of dual point-of-care tests for HIV  
19  
20 457 and syphilis. *Sex Transm Infect* 2017; 93: S3–S15.  
21  
22 458 [36] Kato M, Long NH, Duong BD, et al. Enhancing the Benefits of Antiretroviral Therapy in Vietnam:  
23  
24 459 Towards Ending AIDS. *Curr HIV/AIDS Rep* 2014; 11: 487–495.  
25  
26  
27 460 [37] Kato M, Granich R, Bui DD, et al. The potential impact of expanding antiretroviral therapy and  
28  
29 461 combination prevention in Vietnam: Towards elimination of HIV transmission. *J Acquir Immune*  
30  
31 462 *Defic Syndr*. Epub ahead of print 2013. DOI: 10.1097/QAI.0b013e31829b535b.  
32  
33 463 [38] Kazemian P, Costantini S, Kumarasamy N, et al. The Cost-effectiveness of Human  
34  
35 464 Immunodeficiency Virus (HIV) Preexposure Prophylaxis and HIV Testing Strategies in High-risk  
36  
37 465 Groups in India. *Clin Infect Dis* 2020; 70: 633–642.  
38  
39 466 [39] Cipriano LE, Zaric GS, Holodniy M, et al. Cost Effectiveness of Screening Strategies for Early  
40  
41 467 Identification of HIV and HCV Infection in Injection Drug Users. *PLoS One*. Epub ahead of print  
42  
43 468 2012. DOI: 10.1371/journal.pone.0045176.  
44  
45 469 [40] Reitsema M, Steffers L, Visser M, et al. Cost-Effectiveness of Increased HIV Testing among MSM  
46  
47 470 in The Netherlands. *AIDS* 2019; 33: 1807–1817.  
48  
49  
50 471 [41] Green KE, Vu BN, Phan HT, et al. From conventional to disruptive: upturning the HIV testing  
51  
52 472 status quo among men who have sex with men in Vietnam. *J Int AIDS Soc* 2018; 21: e25127.  
53  
54 473 [42] Withers K, Bristow C, Nguyen M, et al. A field evaluation of a rapid dual immunoassay for human  
55  
56 474 immunodeficiency virus and syphilis antibodies, Hanoi, Vietnam. *Int J STD AIDS* 2019; 30: 173–  
57  
58  
59  
60

1  
2  
3  
4  
5  
6  
7  
8  
9  
10  
11  
12  
13  
14  
15  
16  
17  
18  
19  
20  
21  
22  
23  
24  
25  
26  
27  
28  
29  
30  
31  
32  
33  
34  
35  
36  
37  
38  
39  
40  
41  
42  
43  
44  
45  
46  
47  
48  
49  
50  
51  
52  
53  
54  
55  
56  
57  
58  
59  
60

475 180.

- [43] Vu BN, Green KE, Phan HTT, et al. Lay provider HIV testing: A promising strategy to reach the undiagnosed key populations in Vietnam. *PLoS One* 2018; 13: e0210063.
- [44] Nguyen VTT, Phan HTT, Kato M, et al. Community-led HIV testing services including HIV self-testing and assisted partner notification services in Vietnam: lessons from a pilot study in a concentrated epidemic setting. *J Int AIDS Soc* 2019; 22: e25301.
- [45] Clatts MC, Goldsamt LA, Giang LM, et al. Sexually transmissible infection and HIV prevention and treatment for young male sex workers in Vietnam: Findings from the SHEATH intervention. *Sex Health*. Epub ahead of print 2016. DOI: 10.1071/SH16051.
- [46] Bao A, Colby DJ, Trang T, et al. Correlates of HIV Testing Among Transgender Women in Ho Chi Minh, Vietnam. *AIDS Behav*. Epub ahead of print 2016. DOI: 10.1007/s10461-016-1574-8.
- [47] Magnani R, Riono P, Nurhayati, et al. Sexual risk behaviours, HIV and other sexually transmitted infections among female sex workers in Indonesia. *Sex Transm Infect*. Epub ahead of print 2010. DOI: 10.1136/sti.2009.038059.
- [48] Cassini A, Colzani E, Pini A, et al. Impact of infectious diseases on population health using incidence-based disability-adjusted life years (DALYs): Results from the burden of communicable diseases in Europe study, European Union and European economic countries, 2009 to 2013. *Eurosurveillance*. Epub ahead of print 2018. DOI: 10.2807/1560-7917.ES.2018.23.16.17-00454.

1  
2  
3 494 **FIGURE LEGENDS**  
4

5 495 **Figure 1. Efficiency frontier presenting the total disability adjusted life years (DALYs) and costs for**  
6 496 **five testing scenarios among key populations.** The solid line indicates the scenarios that are not  
7 497 dominated by other scenarios. Dominated indicates that a scenario is either more costly and less effective  
8 498 or has a higher ICER than a scenario that is more effective. The ICERs for the non-dominated scenarios  
9 499 are shown. DALYs=disability adjusted life-years, ICER=incremental cost-effectiveness ratio, RDT=rapid  
10 500 diagnostic test, USD=United States dollars  
11

12 501  
13  
14 502  
15  
16 503  
17 504 **Figure 2. Sensitivity analysis of non-dominated scenarios using a Monte Carlo simulation of the**  
18 505 **cost effectiveness of HIV/syphilis dual testing among key populations in Viet Nam.** Plot shows 10,000  
19 506 iterations in which 17 key parameters were randomly adjusted. All points below the green line are cost-  
20 507 effective at \$2,715 per DALY averted and those below the solid black line (y-intercept) are cost-saving.  
21 508 Only non-dominated scenarios are shown in this figure; cost-effectiveness of *1 Dual Test* is compared to  
22 509 baseline, *1 HIV Test & 1 Dual Test* is compared to *1 Dual Test*, and *2 Dual Tests* is compared to *1 HIV*  
23 510 *Test & 1 Dual Test*. DALYs=disability adjusted life-years, ICER=incremental cost-effectiveness ratio,  
24 511 RDT=rapid diagnostic test, USD=United States dollars.  
25  
26  
27 512  
28  
29 513  
30  
31  
32  
33  
34  
35  
36  
37  
38  
39  
40  
41  
42  
43  
44  
45  
46  
47  
48  
49  
50  
51  
52  
53  
54  
55  
56  
57  
58  
59  
60

1  
2  
3  
4  
5  
6  
7  
8  
9  
10  
11  
12  
13  
14  
15  
16  
17  
18  
19  
20  
21  
22  
23  
24  
25  
26  
27  
28  
29  
30  
31  
32  
33  
34  
35  
36  
37  
38  
39  
40  
41  
42  
43  
44  
45  
46  
47  
48  
49  
50  
51  
52  
53  
54  
55  
56  
57  
58  
59  
60



2116x1058mm (72 x 72 DPI)



2116x1058mm (72 x 72 DPI)

**Table S1. Parameters and probability distributions for Monte Carlo simulation.** Table shows the baseline model parameter values and the probability distributions used for random draws of 17 variables for 10,000 Monte Carlo simulations. Beta distributions were used for all proportion parameters. For the beta distribution, the alpha and beta parameters were calculated as the baseline value multiplied by 100, except for the *impact* parameter where an alpha and beta of 25 was used. Gamma distributions were used for all other parameters. For the gamma distribution, the alpha parameter was calculated as the square of the baseline parameter divided by the square of the standard deviation. The beta parameter was calculated as the square of the standard deviation divided by the baseline parameter.

| <b>Model Parameter</b>                        | <b>Baseline value</b> | <b>Distribution</b> | <b>St. Dev</b> | <b>alpha/beta</b> |
|-----------------------------------------------|-----------------------|---------------------|----------------|-------------------|
| <b>Baseline HIV test acceptance</b>           | 50%                   | Beta                | N/A            | 50                |
| <b>Recommended test acceptance</b>            | 75%                   | Beta                | N/A            | 75                |
| <b>Additional test drop off rate</b>          | 10%                   | Beta                | N/A            | 10                |
| <b>HIV Lay Test Cost</b>                      | \$4.50                | Gamma               | \$3.00         | N/A               |
| <b>Syphilis RPR1 Cost</b>                     | \$6.28                | Gamma               | \$3.50         | N/A               |
| <b>HIV/Syphilis Dual Test Cost</b>            | \$6.50                | Gamma               | \$3.50         | N/A               |
| <b>ART Treatment Cost</b>                     | \$285                 | Gamma               | \$50           | N/A               |
| <b>Syphilis Treatment Cost</b>                | \$6.50                | Gamma               | \$3.50         | N/A               |
| <b>Avg Years on ART</b>                       | 25                    | Gamma               | 3              | N/A               |
| <b>Time Horizon</b>                           | 2035                  | Gamma               | 3              | N/A               |
| <b>Impact</b>                                 | 100%                  | Beta                | N/A            | 25                |
| <b>Baseline Syphilis test acceptance FSW</b>  | 35%                   | Beta                | N/A            | 35                |
| <b>Baseline syphilis test acceptance MSM</b>  | 27%                   | Beta                | N/A            | 27                |
| <b>Baseline syphilis test acceptance PWID</b> | 16%                   | Beta                | N/A            | 16                |
| <b>Baseline syphilis prevalence FSW</b>       | 2.1%                  | Beta                | N/A            | 2.1               |
| <b>Baseline syphilis prevalence MSM</b>       | 6.7%                  | Beta                | N/A            | 6.7               |
| <b>Baseline syphilis prevalence PWID</b>      | 0.3%                  | Beta                | N/A            | 0.3               |

**Table S2. Sensitivity analysis of all scenarios using a Monte Carlo simulation.** Table shows the percentage of simulations (10,000 iterations) in which each scenario is cost-effective (at \$500 or \$2,715 per DALY averted), cost-saving, or less-effective. Less effective scenarios are both less effective and more costly as compared to the scenario above. Scenarios are arranged in order of increasing cost and each scenario is compared to the one immediately above; 1 Dual HIV/syphilis RDT is compared to the baseline scenario.

| Scenario                            | Cost-effective | Cost-effective | Cost-saving | Less effective |
|-------------------------------------|----------------|----------------|-------------|----------------|
|                                     | (\$500)        | (\$2,715)      |             |                |
| 1 Dual HIV/syphilis RDT             | 87%            | 100%           | 59%         | 0%             |
| 1 HIV RDT                           | 11%            | 12%            | 11%         | 69%            |
| 1 Dual HIV/syphilis RDT & 1 HIV RDT | 45%            | 87%            | 31%         | 0%             |
| 2 HIV RDTs                          | 11%            | 12%            | 11%         | 69%            |
| 2 Dual HIV/syphilis RDTs            | 49%            | 55%            | 48%         | 0%             |

DALY=disability adjusted life-year, RDT=rapid diagnostic test

**Figure S1. Cost pressure analysis of testing scenarios.** Figure shows the discounted cost over time of each scenario. Costs are discounted 3% with a time horizon from 2020 – 2035. Baseline costs include testing costs assuming that 50% of key populations are tested for HIV each year and syphilis testing rates are specific to each sub-population (FSW, MSM, and PWID), and syphilis treatment costs. All other scenarios include the cost of HIV treatment averted compared to the baseline scenario, testing costs, and syphilis treatment costs. Scenarios including one test per year assume a 75% test acceptance rate, and those that include two tests per year assume a 75% test acceptance rate for the first test, and a 68.5% test acceptance rate for the second test. Each scenario refers to the number of tests per year. RDT=rapid diagnostic test, USD=United States dollars



# BMJ Open

## Cost-effectiveness of implementing HIV and HIV/syphilis dual testing among key populations in Viet Nam: a modeling analysis

|                                 |                                                                                                                                                                                                                                                                                                                                                                                                                                                                                                                                                                                                                                                                                                                                                                                                                                                                                                                                                                                                                                                                                                                                                                                                                                                                                                                                                                                                                                                                                                                                                                                                                                                                                                                                                                                                            |
|---------------------------------|------------------------------------------------------------------------------------------------------------------------------------------------------------------------------------------------------------------------------------------------------------------------------------------------------------------------------------------------------------------------------------------------------------------------------------------------------------------------------------------------------------------------------------------------------------------------------------------------------------------------------------------------------------------------------------------------------------------------------------------------------------------------------------------------------------------------------------------------------------------------------------------------------------------------------------------------------------------------------------------------------------------------------------------------------------------------------------------------------------------------------------------------------------------------------------------------------------------------------------------------------------------------------------------------------------------------------------------------------------------------------------------------------------------------------------------------------------------------------------------------------------------------------------------------------------------------------------------------------------------------------------------------------------------------------------------------------------------------------------------------------------------------------------------------------------|
| Journal:                        | <i>BMJ Open</i>                                                                                                                                                                                                                                                                                                                                                                                                                                                                                                                                                                                                                                                                                                                                                                                                                                                                                                                                                                                                                                                                                                                                                                                                                                                                                                                                                                                                                                                                                                                                                                                                                                                                                                                                                                                            |
| Manuscript ID                   | bmjopen-2021-056887.R1                                                                                                                                                                                                                                                                                                                                                                                                                                                                                                                                                                                                                                                                                                                                                                                                                                                                                                                                                                                                                                                                                                                                                                                                                                                                                                                                                                                                                                                                                                                                                                                                                                                                                                                                                                                     |
| Article Type:                   | Original research                                                                                                                                                                                                                                                                                                                                                                                                                                                                                                                                                                                                                                                                                                                                                                                                                                                                                                                                                                                                                                                                                                                                                                                                                                                                                                                                                                                                                                                                                                                                                                                                                                                                                                                                                                                          |
| Date Submitted by the Author:   | 08-Jun-2022                                                                                                                                                                                                                                                                                                                                                                                                                                                                                                                                                                                                                                                                                                                                                                                                                                                                                                                                                                                                                                                                                                                                                                                                                                                                                                                                                                                                                                                                                                                                                                                                                                                                                                                                                                                                |
| Complete List of Authors:       | Coomes, David; University of Washington, Department of Epidemiology; University of Washington, Department of Global Health<br>Green, Dylan; University of Washington, Department of Epidemiology; University of Washington, Department of Global Health<br>Barnabas, Ruanne; University of Washington, Department of Global Health; University of Washington, Department of Medicine<br>Sharma , Monisha; University of Washington, Department of Global Health<br>Barr-DiChiara, Magdalena; World Health Organization, Department of Global HIV, Hepatitis and STI Programmes<br>Jamil, Muhammad; World Health Organization, Department of Global HIV, Hepatitis and STI Programmes<br>Baggaley, R; World Health Organization, Department of Global HIV, Hepatitis and STI Programmes<br>Owiredu, Morkor Newman; World Health Organization, Department of Global HIV, Hepatitis and STI Programmes<br>Macdonald, Virginia; World Health Organization, Department of Global HIV, Hepatitis and STI Programmes<br>Nguyen, Van Thi Thuy; World Health Organization, Viet Nam Country Office<br>Vo, Son; Government of Viet Nam Ministry of Health, Viet Nam Authority for HIV/AIDS Prevention and Control<br>Taylor, Melanie; World Health Organization, Department of Global HIV, Hepatitis and STI Programmes; Centers for Disease Control and Prevention, Division of STD Prevention<br>Wi, Teodora; World Health Organization, Department of Global HIV, Hepatitis and STI Programmes<br>Johnson, Cheryl; World Health Organization, Department of Global HIV, Hepatitis and STI Programmes; London School of Hygiene & Tropical Medicine, Clinical Research Department<br>Drake, Alison L.; University of Washington, Department of Global Health; University of Washington, Department of Epidemiology |
| <b>Primary Subject Heading</b>: | Health economics                                                                                                                                                                                                                                                                                                                                                                                                                                                                                                                                                                                                                                                                                                                                                                                                                                                                                                                                                                                                                                                                                                                                                                                                                                                                                                                                                                                                                                                                                                                                                                                                                                                                                                                                                                                           |
| Secondary Subject Heading:      | Epidemiology, Global health, HIV/AIDS, Health policy                                                                                                                                                                                                                                                                                                                                                                                                                                                                                                                                                                                                                                                                                                                                                                                                                                                                                                                                                                                                                                                                                                                                                                                                                                                                                                                                                                                                                                                                                                                                                                                                                                                                                                                                                       |
| Keywords:                       | HEALTH ECONOMICS, HIV & AIDS < INFECTIOUS DISEASES, PUBLIC HEALTH                                                                                                                                                                                                                                                                                                                                                                                                                                                                                                                                                                                                                                                                                                                                                                                                                                                                                                                                                                                                                                                                                                                                                                                                                                                                                                                                                                                                                                                                                                                                                                                                                                                                                                                                          |

1  
2  
3  
4  
5  
6  
7  
8  
9  
10  
11  
12  
13  
14  
15  
16  
17  
18  
19  
20  
21  
22  
23  
24  
25  
26  
27  
28  
29  
30  
31  
32  
33  
34  
35  
36  
37  
38  
39  
40  
41  
42  
43  
44  
45  
46  
47  
48  
49  
50  
51  
52  
53  
54  
55  
56  
57  
58  
59  
60



SCHOLARONE™  
Manuscripts



I, the Submitting Author has the right to grant and does grant on behalf of all authors of the Work (as defined in the below author licence), an exclusive licence and/or a non-exclusive licence for contributions from authors who are: i) UK Crown employees; ii) where BMJ has agreed a CC-BY licence shall apply, and/or iii) in accordance with the terms applicable for US Federal Government officers or employees acting as part of their official duties; on a worldwide, perpetual, irrevocable, royalty-free basis to BMJ Publishing Group Ltd ("BMJ") its licensees and where the relevant Journal is co-owned by BMJ to the co-owners of the Journal, to publish the Work in this journal and any other BMJ products and to exploit all rights, as set out in our [licence](#).

The Submitting Author accepts and understands that any supply made under these terms is made by BMJ to the Submitting Author unless you are acting as an employee on behalf of your employer or a postgraduate student of an affiliated institution which is paying any applicable article publishing charge ("APC") for Open Access articles. Where the Submitting Author wishes to make the Work available on an Open Access basis (and intends to pay the relevant APC), the terms of reuse of such Open Access shall be governed by a Creative Commons licence – details of these licences and which [Creative Commons](#) licence will apply to this Work are set out in our licence referred to above.

Other than as permitted in any relevant BMJ Author's Self Archiving Policies, I confirm this Work has not been accepted for publication elsewhere, is not being considered for publication elsewhere and does not duplicate material already published. I confirm all authors consent to publication of this Work and authorise the granting of this licence.

1 **Cost-effectiveness of implementing HIV and HIV/syphilis dual testing among key populations in Viet Nam: a**  
2  
3 **modeling analysis**

4  
5 David Coomes<sup>1,2</sup>, Dylan Green<sup>1,2</sup>, Ruanne Barnabas<sup>1,2,3</sup>, Monisha Sharma<sup>2</sup>, Magdalena Barr-DiChiara<sup>4</sup>,  
6 Muhammad S. Jamil<sup>4</sup>, Rachel Baggaley<sup>4</sup>, Morkor Newman Owiredo<sup>4</sup>, Virginia Macdonald<sup>4</sup>, Van Nguyen<sup>5</sup>, Son  
7 Vo Hai<sup>6</sup>, Melanie M. Taylor<sup>4,7</sup>, Teodora E Wi<sup>4</sup>, Cheryl Johnson<sup>4,8</sup>, Alison L. Drake<sup>1,2§</sup>  
8

9  
10 1. University of Washington, Department of Epidemiology, Seattle, WA, USA

11 2. University of Washington, Department of Global Health, Seattle, WA, USA

12 3. University of Washington, Department of Medicine, Seattle, WA, USA

13 4. Department of Global HIV, Hepatitis and STI Programmes, World Health Organization, Geneva, Switzerland

14 5. Viet Nam Country Office, World Health Organization, Hanoi, Viet Nam

15 6. Viet Nam Authority for HIV/AIDS Prevention and Control, Ministry of Health, Hanoi, Viet Nam

16 7. Division of STD Prevention, Centers for Disease Control and Prevention, Atlanta, GA, USA

17 8. Clinical Research Department, London School of Hygiene and Tropical Medicine, London, United Kingdom

18  
19 § Corresponding author: Alison L. Drake

20 325 9th Avenue

21 Box 359909

22 Seattle, WA 98195, USA

23 Phone: 1-206-543-5847

24 Email: [adrake2@uw.edu](mailto:adrake2@uw.edu)

25  
26 Disclaimer: The views expressed in this manuscript are those of the authors and do not necessarily represent the  
27 official position of the World Health Organization or the United States Centers for Disease Control  
28  
29

30  
31  
32  
33  
34  
35  
36  
37  
38  
39  
40  
41  
42  
43 Word count: 4,323

44  
45 Abstract word count: 292

46  
47  
48  
49  
50  
51  
52  
53  
54  
55  
56  
57  
58  
59  
60  
Keywords: HIV testing, syphilis testing, key populations, 95-95-95

## 35 ABSTRACT

### 36 Objectives

37 Key populations, including sex workers, men who have sex with men, and people who inject drugs, have a high  
38 risk of HIV and sexually transmitted infections (STIs). We assessed the health and economic impacts of  
39 different HIV and syphilis testing strategies among three key populations in Viet Nam using a dual HIV/syphilis  
40 rapid diagnostic test (RDT).

### 41 Setting

42 We used the Spectrum AIDS Impact Model to simulate the HIV epidemic in Viet Nam and evaluated five  
43 testing scenarios among key populations. We used a 15-year time horizon and a provider perspective for costs.

### 44 Participants

45 We simulate the entire population of Viet Nam in the model.

### 46 Interventions

47 We modeled five testing scenarios among key populations: 1) annual testing with an HIV rapid diagnostic test  
48 (RDT), 2) annual testing with a dual RDT, 3) biannual testing using dual RDT and HIV RDT, 4) biannual  
49 testing using HIV RDT, and 5) biannual testing using dual RDT.

### 50 Primary and secondary outcome measures

51 The primary outcome is incremental cost-effectiveness ratios (ICERS). Secondary outcomes include HIV and  
52 syphilis cases.

### 53 Results

54 Annual testing using a dual HIV/syphilis RDT was cost-effective (\$10 per disability-adjusted life year (DALY))  
55 and averted 3,206 HIV cases and treated 27,727 syphilis cases compared to baseline over 15 years. Biannual  
56 testing using one dual test and one HIV RDT (\$1,166 per DALY), or two dual tests (\$5,672 per DALY) both  
57 averted an additional 875 HIV cases, although only the former scenario was cost-effective. Annual or biannual  
58 HIV testing using HIV RDTs and separate syphilis tests were more costly and less effective than using one or  
59 two dual RDTs.

### 60 Conclusions

61 Annual HIV and syphilis testing using dual RDT among key populations is cost-effective in Vietnam and  
1  
2  
32 similar settings to reach global reduction goals for HIV and syphilis.  
3  
4  
5  
6  
7  
8  
9  
10  
11  
12  
13  
14  
15  
16  
17  
18  
19  
20  
21  
22  
23  
24  
25  
26  
27  
28  
29  
30  
31  
32  
33  
34  
35  
36  
37  
38  
39  
40  
41  
42  
43  
44  
45  
46  
47  
48  
49  
50  
51  
52  
53  
54  
55  
56  
57  
58  
59  
60

For peer review only

**STRENGTHS AND LIMITATIONS OF THIS STUDY**

- Strength: Our model parameters are informed by empiric data including demographic, behavioral, and biological data from government sources, surveys, surveillance, publicly available reports, databases, and peer-reviewed literature.
- Strength: We assess the impact of five testing scale up scenarios using both HIV RDT and dual HIV/syphilis RDT and conduct sensitivity analyses to evaluate uncertainty in model results.
- Limitation: Due to limited data, we make assumptions regarding the timing and uptake of HIV and syphilis testing among key populations that may be inaccurate.
- Limitation: Our model conservatively assumes that increased syphilis testing and treatment will not impact syphilis prevalence, which is currently unknown.

## INTRODUCTION

Key populations, including people who inject drugs (PWID), men who have sex with men (MSM), sex workers (SW), and transgender populations are at higher risk of acquiring both HIV and syphilis. HIV incidence is significantly higher among key populations compared to the general population in all geographic regions; however, differences vary substantially by region and by key population.[1] While key populations and their sexual partners represent approximately 25% of new HIV cases in sub-Saharan Africa, they represent 80% of new HIV cases in the rest of the world.[2] Recent data suggests syphilis incidence, while generally remaining stable in low- and middle-income countries (LMIC), is increasing among key populations, particularly MSM.[1, 3, 4] World Health Organization (WHO) HIV testing guidelines recommend HIV retesting at least annually for key populations and more frequent testing (3-6 months) for those with high ongoing risk.[5] WHO guidelines for syphilis screening depend on population and setting. Laboratory-based syphilis testing remains common, however rapid diagnostic tests (RDTs) for syphilis are increasingly available and may be used to improve access to testing and treatment, including among key populations who are disproportionately affected by both HIV and syphilis.[6] With the introduction of prequalified dual HIV/syphilis RDTs, and the recent WHO recommendation to offer dual HIV/syphilis testing in antenatal care (ANC) settings,[7] it is important to evaluate how further integration and expansion of dual HIV/syphilis testing could benefit key populations.

Since 2015, WHO has recommended immediate initiation of antiretroviral therapy (ART) for all people living with HIV (PLHIV) [8] and the United Nations 95-95-95 targets aim to diagnose 95% of PLHIV, provide 95% of PLHIV who know their status with ART, and ensure 95% PLHIV on ART are virally suppressed.[9] Despite progress towards these goals – in 2019 81% of PLHIV knew their HIV status and 67% were on ART – this progress is uneven; only 2/3 of key populations are aware of their HIV status.[2] While key populations lag behind the general population in all phases of testing, linkage to treatment, and viral suppression, the largest gap exists in testing.[10] WHO has also developed a global strategy on sexually transmitted infections (STIs) which aims for a 90% reduction in syphilis incidence by 2030, and 70% of key populations to have access to STI and HIV services, including prevention, testing, and treatment.[11] Increased syphilis testing and treatment may reduce

100 syphilis burden among key and general populations, as well as HIV incidence since early symptomatic syphilis  
101 increases risks of HIV acquisition and transmission.[3] Currently, WHO recommends syphilis testing for pregnant  
102 women and key populations, however, the optimal frequency of syphilis testing is unknown and recommendations  
103 on syphilis testing for other populations are not available.

104 In Viet Nam, the national HIV prevalence is <1% in the general population, and significantly higher in key  
105 populations, with prevalence ranging between 3-13% among PWID, MSM, and female sex workers (FSW).  
106 Similarly, syphilis prevalence among MSM (6.7%) and FSW (2.1%) are also higher than that of the general  
107 population (0.3%).[12] With budgetary constraints in HIV/STI programs and the health sector, identifying cost-  
108 effective strategies for targeted HIV and syphilis testing among key groups in Viet Nam is crucial to inform  
109 policymakers seeking to optimize resource allocation to maximize population health. We modeled the health  
110 impacts and costs associated with varying frequencies of HIV and syphilis testing for key populations, using test  
111 scenarios that include a dual HIV/syphilis RDT.

## 112 **METHODS**

### 113 **Model**

114 We used the AIDS Impact Model within the Spectrum software package (v 5.76) to simulate the HIV epidemic  
115 in Viet Nam from 2020-2035. The model estimates annual HIV incidence, AIDS mortality, and disability. We  
116 simulated the impact of increasing HIV testing frequency among key populations using the Goals model within  
117 Spectrum, as previously described.[13] Briefly, Spectrum is a deterministic, compartmental mathematical model  
118 of HIV transmission stratified by sex and age. Transmission is simulated through male-female and male-male sex  
119 acts, needle sharing for injection, and maternal-to-child transmission with specific transmission probabilities for  
120 each route. One can further specify parameters for low- and medium-risk groups, as well as high-risk categories  
121 including FSW, MSM, and PWID.<sup>1</sup> Each of these high-risk categories is nested within their parent categories and  
122

---

123 <sup>1</sup> Low-risk heterosexuals are those in stable couples while medium-risk heterosexuals are those that engage in casual sex but are not  
124 in a high-risk group (high risk groups: MSM, FSW, PWID).

interact with one another. For example, among MSM, a proportion is assumed to also have female sexual partners. These high-risk categories can be parameterized to have differential rates of partnership and uptake of interventions. The model was parameterized with demographic, behavioral, and biological data from government sources, surveys, surveillance, publicly available reports, databases, and peer-reviewed literature. To estimate syphilis burden, we used key population size estimates from the Goals model and population-specific estimates of prevalence;<sup>[12]</sup> we estimate the number of persons in key populations testing positive and treated for syphilis infection under each scenario. This model assumes that syphilis testing and treatment does not impact syphilis prevalence, although increased screening could potentially result in reduced, unchanged, or increased syphilis prevalence depending on coverage.<sup>[14, 15]</sup> For both HIV and syphilis, disability-adjusted life years (DALYs) are calculated for each scenario. Model key parameters are shown in **Table 1**.

### Settings and Populations

We modeled three key populations: MSM, PWID, and FSW (and their clients) within the HIV epidemic in Viet Nam, using national level HIV prevalence and syphilis prevalence estimates for each key population (**Table 1**).

**Table 1. Model parameters for Spectrum input and cost-effectiveness analysis of HIV and syphilis testing scale up among key populations in Viet Nam.** <sup>a</sup> = 2018 Viet Nam HIV Sentinel Surveillance. <sup>b</sup> = 2019 Viet Nam HIV Sentinel Surveillance. \* = Spectrum model prior. \*\* = assumed. \*\*\* = Based on information from in-country source.

| Model parameter                           | Value |
|-------------------------------------------|-------|
| HIV Prevalence                            |       |
| MSM (incl. TGW) <sup>a</sup>              | 10.8% |
| PWID <sup>b</sup>                         | 12.7% |
| FSW <sup>a</sup>                          | 3.6%  |
| Syphilis Prevalence <sup>[12]</sup>       |       |
| MSM (incl. TGW)                           | 6.7%  |
| PWID                                      | 0.3%  |
| FSW                                       | 2.1%  |
| Baseline syphilis test acceptance         |       |
| MSM (incl. TGW) <sup>[16],[17],[18]</sup> | 27%   |
| PWID <sup>[19]</sup>                      | 16%   |
| FSW <sup>[20],[21]</sup>                  | 35%   |
| Syphilis DALYs averted <sup>[22]</sup>    |       |
| DALYs averted per syphilis case treated   | 0.04  |
| ART                                       |       |

|                                  |             |
|----------------------------------|-------------|
| 2019 Coverage***                 | 70%         |
| Annual Scale-Up**                | 4.8%        |
| Transmission Reduction Efficacy* | 70%         |
| Mortality Reduction Efficacy*    | 80%         |
| <hr/>                            |             |
| Other Prevention                 |             |
| Condom Use**                     | 50%         |
| Condom Efficacy*                 | 80%         |
| PrEP Coverage (MSM incl. TGW)**  | 5%          |
| PrEP Efficacy*                   | 90%         |
| PrEP Adherence*                  | 80%         |
| <hr/>                            |             |
| Costs***                         |             |
| HIV Lay Test†                    | \$4.50      |
| Syphilis RPR†                    | \$6.28      |
| Syphilis TPHA†                   | \$10.26     |
| HIV/Syphilis Dual Test†          | \$6.50      |
| ART‡                             | \$285       |
| Syphilis Treatment               | \$6.50      |
| Time Horizon                     | 2020 - 2035 |
| Discount Rate                    | 3%          |

† Testing costs include labor, incentives, travel costs, and test kits. Primary cost driver between tests is the cost of the test kit.

‡ ART cost includes labor, laboratory monitoring costs, ARVs, and other recurring costs.

\* MSM=men who have sex with men, FSW=female sex workers, PWID=people who inject drugs, TGW=transgender women, ART=antiretroviral therapy, PrEP=pre-exposure prophylaxis, syphilis RPR=syphilis rapid plasma reagin, syphilis TPHA=treponema pallidum hemagglutination assay, DALY=disability-adjusted life year

## Scenarios

Our baseline scenario estimates annual HIV testing based on current WHO recommendations and estimated HIV testing rates among key populations,[5] and syphilis testing based on observed uptake. In the baseline scenario, we assume 50% of individuals in key populations test annually for HIV, and syphilis screening with a non-treponemal test (RPR) occurs at rates specific to each key population (**Table 2**).[18–20] Individuals who test positive using RPR are given a confirmatory treponemal (TPHA) test. We modeled HIV RDTs as WHO recommend, limiting the use of lab-based testing such as western blot, especially in hard-to-reach populations, to increase access and limit the loss to follow up.[23] We considered alternative scenarios with varying testing frequency and test type (separate HIV and syphilis RPR, or a combined dual syphilis/HIV RDT) among key populations from 2020 to 2035. Scenarios modeled include: **1**) annual HIV testing with RDT and baseline syphilis RPR testing, **2**) annual testing with dual RDT, **3**) biannual testing (2 times per year), first with dual RDT and then with HIV RDT, **4**) biannual HIV testing with RDT and baseline syphilis RPR testing, and **5**) biannual testing with

dual RDT (**Table 2**). We assumed 75% test acceptance for the first test in all scenarios except baseline, and 90% of those who accepted the first test would accept the second test in all scenarios that include biannual testing. All individuals who test positive for syphilis using the dual test are then tested using RPR and TPHA per current Viet Nam country guidelines.

**Table 2: HIV/syphilis testing scenarios among key populations in Viet Nam.** The table cells show the proportion of key populations in Viet Nam that receive each test per year. If not specified, the proportion refers to all key populations.

| Scenario                                   | Proportion of key population receiving HIV or syphilis testing per year |             |                                     |                  |
|--------------------------------------------|-------------------------------------------------------------------------|-------------|-------------------------------------|------------------|
|                                            | 1 HIV test                                                              | 2 HIV tests | 1 syphilis test                     | 2 syphilis tests |
| Baseline                                   | 50%                                                                     | -           | 35% (FSW), 27% (MSM),<br>16% (PWID) | -                |
| 1. One HIV RDT                             | 75%                                                                     | -           | 35% (FSW), 27% (MSM),<br>16% (PWID) | -                |
| 2. One Dual HIV/syphilis RDT               | 75%                                                                     | -           | 75%                                 | -                |
| 3. One HIV RDT & One Dual HIV/syphilis RDT | 75%                                                                     | 68%         | 75%                                 | -                |
| 4. Two HIV RDTs                            | 75%                                                                     | 68%         | 35% (FSW), 27% (MSM),<br>16% (PWID) | -                |
| 5. Two Dual HIV/syphilis RDT               | 75%                                                                     | 68%         | 75%                                 | 68%              |

\* MSM=men who have sex with men, FSW=female sex workers, PWID=people who inject drugs, RDT=rapid diagnostic test.

We modeled increases in testing coverage by adjusting the percent of people living with HIV (PLWH) on ART; in scenarios with increased testing there is a higher probability that an individual in the model will initiate ART throughout the year. The baseline scenario assumes 95% ART coverage among PLWH by 2028 (4.8% increase per year) based on recent ART scale-up in Viet Nam; test coverage increases by 6.0% per year with annual HIV testing (HIV RDT or dual RDT), and by 7.2% per year with biannual testing. Maximum test coverage is 95% for each model. All models assume ART coverage of 66% of men and 72% of women living with HIV in 2020 based on estimates from the Viet Nam HIV-AIDS Technical Working Group (TWG). Modeled HIV incidence per year is shown in **Figure S1**. We assume universal treatment among those who test positive for syphilis, individuals

175 treated cannot become re-infected within the same year,[24] and no changes to syphilis prevalence under test case  
176 scenarios.

## 177 **Costs**

178 Testing cost inputs include cost per HIV RDT test, rapid plasma reagin (RPR), treponema pallidum  
179 hemagglutination (TPHA), and dual HIV/syphilis RDT. We used local data on the personnel, commodities, and  
180 transport costs associated with lay testing and estimate costs (**Table 1**). ART costs include personnel,  
181 commodities, clinical follow-up, and laboratory monitoring. This analysis includes the costs of intervention  
182 delivery and treatment (Benzathine penicillin G and ART) but does not consider additional averted sequelae costs  
183 such as the treatment of opportunistic infections due to uncontrolled HIV. All costs are from the provider's  
184 perspective and reported in 2019 US dollars.

## 185 **Cost-Effectiveness**

186 Health impact was measured in DALYs averted, HIV infections averted, syphilis infections treated, and AIDS-  
187 related deaths averted over the 15-year time horizon. This time horizon was chosen because it reflects current  
188 HIV program planning in Viet Nam. HIV outcomes are modeled for the entire population of Viet Nam while  
189 syphilis outcomes are specific to key populations. Costs and health benefits were discounted at 3% annually per  
190 standard health economic evaluations.[25] Incremental costs were calculated as costs incurred and averted by the  
191 testing strategy. We utilized WHO guidelines for cost-effectiveness threshold: less than gross domestic product  
192 (GDP) per capita is considered cost-effective in Viet Nam (\$2,715 USD in 2019).[26]

## 193 **Model calibration and sensitivity analyses**

194 Models were calibrated to national HIV prevalence data for each key population. Monte Carlo sensitivity analyses  
195 were conducted to evaluate robustness of results to changes in: HIV and syphilis testing coverage, scenario  
196 program uptake rate, HIV and syphilis testing cost, HIV and syphilis treatment cost, average years on ART, and  
197 time horizon. **Table S1** shows the model parameters, ranges, and distributions used in the sensitivity analysis.

## 198 **Patient and public involvement**

199 It was not appropriate or possible to involve patients or the public in the design, conduct, reporting, or  
200 dissemination plans of our research.

## 201 202 **RESULTS**

203 Increasing annual HIV test coverage from 50% (baseline) to 75% using an HIV RDT (scenario 1) or a dual RDT  
204 (scenario 2) is projected to avert 3,206 HIV infections and 660 AIDS-related deaths by 2035 in Viet Nam (**Table**  
205 **3**). Annual testing using dual RDT led to treatment of an additional 27,727 syphilis cases over 15 years compared  
206 to using HIV RDT, but the number of HIV infections averted was the same. HIV testing with either HIV or dual  
207 RDT biannually (scenarios 3, 4, & 5) was projected to avert an additional 875 HIV infections and 183 AIDS-  
208 related deaths by 2035 compared to annual testing. Testing using a dual HIV/syphilis RDT biannually among key  
209 populations is projected to lead to an additional 88,401 syphilis cases treated by 2035, compared to annual testing  
210 using a dual RDT (88,953 total syphilis cases treated).

**Table 3. Estimated HIV and syphilis infections, and cost-effectiveness of increased HIV and Dual HIV/syphilis testing among key populations in Viet Nam from 2020-2035.** Each scenario refers to the number of tests per year. The baseline scenario assumes that 50% of key populations are tested for HIV each year and syphilis testing rates are specific to each sub-population (FSW, MSM, and PWID). Scenarios including one test per year assume a 75% test acceptance rate, and those that include two tests per year assume a 75% test acceptance rate for the first test, and a 68.5% test acceptance rate for the second test. *Incremental cases averted*, *Total DALYs averted*, and *ICERs* compare each scenario to the previous one.

|                                      |                        | Scenario     |              |              |                |              |              |
|--------------------------------------|------------------------|--------------|--------------|--------------|----------------|--------------|--------------|
|                                      |                        | Baseline     | 1 Dual Test  | 1 HIV Test   | 1 HIV & 1 Dual | 2 HIV Tests  | 2 Dual Tests |
| HIV                                  | New HIV infections     | 57,902       | 54,696       | 54,696       | 53,821         | 53,821       | 53,821       |
|                                      | AIDS deaths            | 13,877       | 13,217       | 13,217       | 13,034         | 13,034       | 13,034       |
|                                      | Total HIV DALYs        | 174,567,240  | 174,508,007  | 174,508,007  | 174,490,608    | 174,490,608  | 174,490,608  |
| Syphilis                             | Total cases treated    | 88,953       | 116,680      | 88,953       | 116,680        | 88,953       | 177,354      |
|                                      | Total DALYs treated    | 2,831        | 3,713        | 2,831        | 3,713          | 2,831        | 5,644        |
| Incremental cases averted            | HIV infections averted | -            | 3,206        | 0            | 875            | 0            | 0            |
|                                      | HIV DALYs averted      | -            | 59,233       | 0            | 17,399         | 0            | 0            |
|                                      | Syphilis cases treated | -            | 27,727       | -27,727      | 27,727         | -27,727      | 88,401       |
|                                      | Syphilis DALYs averted | -            | 882          | -882         | 882            | -882         | 2,813        |
| Total DALYs averted (HIV & Syphilis) |                        | -            | 60,115       | -882         | 18,281         | -882         | 2,813        |
| Costs (USD)                          | Net Costs              | \$31,036,672 | \$31,659,182 | \$33,094,783 | \$51,942,954   | \$53,378,555 | \$62,896,039 |
|                                      | HIV testing            | \$16,491,955 | -            | \$24,683,204 | \$22,142,027   | \$46,825,230 | -            |
|                                      | HIV treatment averted  | -            | -\$6,133,138 | -\$6,133,138 | -\$7,991,393   | -\$7,991,393 | -\$7,991,393 |
|                                      | Syphilis testing       | \$14,084,698 | \$1,535,409  | \$14,084,698 | \$1,535,409    | \$14,084,698 | \$2,333,826  |
|                                      | Syphilis treatment     | \$460,019    | \$603,395    | \$460,019    | \$603,395      | \$460,019    | \$917,162    |
|                                      | Dual testing           | -            | \$35,653,516 | -            | \$35,653,516   | -            | \$67,636,444 |
| Total incremental costs              |                        | -            | \$622,510    | \$1,435,601  | \$18,848,171   | \$1,435,601  | \$9,517,484  |
| ICERs (cost per DALY averted)        |                        | -            | \$10         | <i>Dom</i>   | \$1,166        | <i>Dom</i>   | \$5,672      |

\*DALY=disability adjusted life-years, USD=United States dollars, ICERs=incremental cost-effectiveness ratios, FSW=female sex workers, MSM=men who have sex with men, PWID=people who inject drugs

1  
2  
3  
4  
5  
6  
7  
8  
9  
10  
11  
12  
13  
14  
15  
16  
17  
18  
19  
20  
21  
22  
23  
24  
25  
26  
27  
28  
29  
30  
31  
32  
33  
34  
35  
36  
37  
38  
39  
40  
41  
42  
43  
44  
45  
46  
47  
48  
49  
50  
51  
52  
53  
54  
55  
56  
57  
58  
59  
60

The most effective strategy was biannual testing among MSM, PWID, and FSW with the dual RDT, which was projected to avert 4,081 HIV infections (7% of total infections), 76,632 HIV DALYs (0.04% of total HIV DALYs), and treat 88,401 cases of syphilis by 2035 compared to the baseline scenario. The discounted cost of implementing this scenario over 30 years is \$62.9 million USD compared to \$31.0 million USD for the baseline scenario. The testing cost of implementing biannual testing using the dual RDT is approximately four times the cost of baseline testing with an HIV RDT (\$67.6 million vs. \$16.5 million, respectively), but an estimated \$8.0 million USD in HIV treatment costs would be averted by biannual HIV testing, and \$11.8 million USD in syphilis testing costs would be averted by using the dual RDT. The cost of biannual testing with an HIV RDT and continuing to test for syphilis with RPR is higher than biannual testing with one dual RDT and one HIV RDT (\$53.4 vs. \$51.9 million USD, respectively), but using one dual test in biannual testing treats an estimated 28,000 more cases of syphilis over 15 years while averting the same number of HIV cases.

Annual testing with the dual RDT is cost-effective compared to the baseline scenario (\$10 USD per DALY averted) (**Figure 1**). Annual HIV testing with HIV RDT is more expensive and averts fewer DALYs than with the dual RDT (strongly dominated). The next most efficient scenario is biannual testing using one dual RDT and one HIV RDT, which is cost-effective (\$1,166 USD per DALY averted). Biannual testing with HIV RDT is less effective and more costly than biannual testing using one dual RDT and one HIV RDT, while biannual testing using the dual RDT provides additional health benefits but is not cost-effective (\$5,672 USD per DALY averted). Despite slightly higher initial costs, the discounted cost of annual testing with a dual RDT becomes less than that of current testing within two years, due to decreased ART costs associated with HIV averted (**Figure S2**).

Sensitivity analyses including all scenarios found that an annual dual RDT (scenario 2) is cost-saving in 52% of the simulations and either cost-saving or cost-effective (at \$2,715 per DALY averted) in all

1  
2  
3 242 simulations (**Table S2**). Biannual testing using one dual RDT and one HIV RDT was cost-effective in  
4  
5 243 86% of simulations, but cost-saving in only 1% of simulations (**Figure 2**). Biannual testing using two dual  
6  
7  
8 244 RDTs was cost-effective in 45% of simulations and cost-saving in 31% of simulations as compared to  
9  
10 245 biannual testing with one dual RDT and one HIV RDT. In univariate sensitivity analysis adjusting costs,  
11  
12 246 our scenarios that involve one dual RDT (scenarios 2 and 3) remain cost-effective even after all costs  
13  
14  
15 247 (testing and treatment) are increased by 50% (\$16 and \$1,705 USD per DALY averted respectively).  
16  
17  
18 248

## 19 20 249 **DISCUSSION**

21  
22  
23 250 In this modeling analysis we found that implementing annual testing among key populations with the dual  
24  
25 251 RDT at 75% coverage was cost-effective, averted more HIV infections, and treated more syphilis cases  
26  
27 252 compared to annual testing using HIV RDT at 50% coverage and current syphilis testing in Viet Nam.  
28  
29 253 While biannual testing with one dual RDT and one HIV RDT was projected to be more costly, it would  
30  
31  
32 254 avert more HIV and syphilis related DALYs, and using dual RDT for both tests would avert additional  
33  
34 255 DALYs attributed to syphilis, although this latter scenario was not found to be cost-effective. Increasing  
35  
36 256 the frequency of HIV testing to one or two tests per year using only HIV RDTs (scenario 1 & 4), while  
37  
38  
39 257 continuing to screen for syphilis using RPR, was not efficient compared to other strategies.  
40

41  
42 258 Implementing biannual testing substantially increases testing costs, but also prevents more HIV infections,  
43  
44 259 therefore averting more HIV healthcare costs, including ART and hospitalizations. Increasing test  
45  
46 260 frequency may be cost-saving or cost-effective, although it incurs considerable costs in the near term while  
47  
48 261 costs averted may not be observed for many years. Annual testing using a dual RDT can help offset some  
49  
50  
51 262 near-term costs as it is less expensive than using HIV RDT and syphilis RPR. Policymakers must weigh  
52  
53 263 the health impact and cost-effectiveness of different testing scenarios over time against current  
54  
55  
56  
57  
58  
59

1  
2  
3 264 affordability; however, using the dual RDT will help integrate syphilis testing within existing HIV testing  
4  
5 265 programs, improving program efficiencies.[27]  
6  
7

8 266 Implementation of dual RDT is occurring in some settings; preliminary reports indicate that 49 countries  
9  
10 267 have adopted policies to use dual HIV/syphilis RDT in ANC, and 15% of reporting counties have policies  
11  
12 to support their use in key populations, although the extent of implementation is unknown.[28] The  
13 268  
14  
15 269 President's Emergency Plan for AIDS Relief (PEPFAR) and the Global Fund both fund dual RDT in  
16  
17 270 ANC,[29] and there are multiple dual RDTs prequalified by the WHO.[30] The use of dual RDT during  
18  
19  
20 271 ANC could be a model for improving HIV/STI integration, particularly among those at high risk for both  
21  
22 272 HIV and syphilis, such as key populations, however, there are operational challenges associated with  
23  
24 273 integrating HIV and STI programs and delivering person-centered diagnosis, treatment, and prevention  
25  
26  
27 274 services.[31]  
28

29 275 Benefits of the dual test are its potential to cost-effectively reach more at-risk individuals at the point-of-  
30  
31 care. Annual or biannual testing can enable earlier identification of HIV-positive individuals for faster  
32 276  
33  
34 277 ART initiation and prevention of onward transmission. Annual HIV testing for key populations is  
35  
36 278 recommended by WHO, and more frequent testing (every 3-6 months) may be advised for those with  
37  
38  
39 279 individual risk factors, including those using pre-exposure prophylaxis (PrEP) and key populations  
40  
41 280 presenting with STIs.[23] Individuals presenting with syphilis symptoms should also test for HIV, and  
42  
43 281 using the dual RDT is less costly as compared to a syphilis RPR and HIV RDT. As policymakers scale up  
44  
45  
46 282 PrEP among key populations in Viet Nam, including at least one dual RDT in the testing algorithm may  
47  
48 283 be more cost-effective than using HIV RDTs alone. In addition, using dual RDT tests can facilitate lay  
49  
50 284 providers to offer both HIV and syphilis testing for their community.[32]  
51  
52

53 285 Our results were robust to sensitivity analyses, suggesting that testing annually or biannually using dual  
54  
55 286 RDTs remains cost-effective if testing costs increase and HIV prevalence decreases. In scenarios  
56  
57  
58  
59  
60

1  
2  
3 287 involving dual RDT, the majority (>98%) of benefits, as measured in DALYs, come from averting HIV  
4  
5 288 infections rather than treating syphilis due to the relatively large burden of disease from HIV compared to  
6  
7  
8 289 syphilis. However, since the cost of a dual RDT is only slightly higher than the cost of an HIV RDT, it is  
9  
10 290 cheaper to use a dual RDT than separate HIV RDT and syphilis RPR tests in situations where both tests  
11  
12 291 are recommended.

14  
15 292 Increased HIV testing can reduce HIV-associated morbidity and mortality and transmission from PLHIV  
16  
17 293 through early detection and initiation of ART. While models suggest high ART coverage would result in  
18  
19  
20 294 substantial declines in HIV incidence,[33, 34] empiric data from countries with population-level viral  
21  
22 295 suppression exceeding 73% (e.g. Australia, eSwatini, and Thailand) have observed less significant  
23  
24 296 reductions in HIV incidence relative to predictions from mathematical models.[35] Similarly, when high  
25  
26  
27 297 ART coverage was achieved in a series of cluster-randomized trials in sub-Saharan Africa, it resulted in  
28  
29 298 decreased population-level HIV incidence; however, this decrease was insufficient to end HIV as a public  
30  
31 299 health threat.[36–39] These discrepancies may in part be attributed to delayed diagnosis and ART  
32  
33  
34 300 initiation following infection,[40, 41] and gaps in the 95-95-95 targets for some population groups, for  
35  
36 301 example young men and key populations. Additional barriers may include poor coverage of evidence-  
37  
38 302 based prevention interventions and persistent structural barriers, particularly for key populations. More  
39  
40  
41 303 frequent HIV testing strategies could increase earlier diagnosis and initiation on ART and focusing testing  
42  
43 304 and linkage efforts on key populations could reduce the access and coverage disparities in these groups.  
44  
45 305 However, more frequent testing will also increase program costs, not only through additional commodity  
46  
47 306 procurement but also for health systems, program coordination, and outreach. Policymakers may likely  
48  
49  
50 307 benefit from targeting limited testing resources towards high-risk groups such as key populations.

51  
52 308 Dual RDTs may also increase syphilis testing frequency and coverage among key populations who are  
53  
54  
55 309 more likely to access HIV testing than testing for syphilis. Previous research has shown that coupling  
56  
57  
58  
59  
60

1  
2  
3 310 rapid syphilis testing in ANC may also increase HIV test coverage in LMICs, particularly in settings where  
4  
5 311 HIV test coverage is low.[42] This strategy may be similarly effective at increasing test coverage for both  
6  
7  
8 312 diseases among key populations, as well as augment current ANC testing by reaching women in key  
9  
10 313 populations who present late or are missed by ANC services. While there is a lack of data on dual RDTs  
11  
12 314 among key populations, models of dual RDT during ANC have been shown to be cost-saving or cost-  
13  
14  
15 315 effective among both key populations and the general population of pregnant women.[7, 43] While dual  
16  
17 316 RDTs are likely more effective in the context of ANC since testing can avert more adverse outcomes  
18  
19 317 associated with congenital syphilis and mother-to-child HIV transmission, we find dual RDTs may also  
20  
21  
22 318 be cost-effective among non-pregnant key populations.

23  
24 319 Our results are consistent with previously published models that show expanded testing and early access  
25  
26  
27 320 to ART for key populations in Viet Nam will cost-effectively reduce the country's HIV burden.[44, 45]  
28  
29 321 Additionally, models from both low- and high-resource countries suggest HIV testing every 3-6 months  
30  
31 322 among key populations can be cost-effective in concentrated epidemics.[46, 47] However, HIV risk within  
32  
33  
34 323 key populations is not homogenous; further targeting of higher-risk groups within key populations may  
35  
36 324 be needed to achieve efficient testing regimens. While we examine the impact of increased testing  
37  
38 325 frequency among key populations as a whole, previous research has described the benefits of targeting  
39  
40  
41 326 high-risk groups within key populations.[48] Individuals who engage in risky behaviors, such as those  
42  
43 327 with more sexual partners, practicing unprotected sex, or needle/syringe sharing may benefit from  
44  
45 328 additional testing or linkage to HIV prevention such as PrEP and harm reduction interventions. Further  
46  
47 329 research is needed on the optimal testing intervals for higher-risk groups of key populations.

49  
50 330 Globally, approximately one-third of key populations are not aware of their HIV status. Programs focusing  
51  
52  
53 331 on HIV testing and treatment among FSW and PWID in Viet Nam have shown success in reducing HIV  
54  
55 332 prevalence in these groups; however, less than a third of MSM reported testing for HIV in 2015, likely

1  
2  
3 333 contributing to increases in HIV prevalence among this group in the past decade.[49] Annual syphilis  
4  
5 334 testing among key populations in Viet Nam is similarly low, ranging from 16% among PWID to 36%  
6  
7  
8 335 among FSW.[18–20] Due to high dual prevalence of HIV and syphilis among key populations, dual testing  
9  
10 336 is a promising strategy to increase testing coverage and linkage to care.

11  
12  
13 337 Our analysis has several limitations. We did not include the cost of scaling-up and training providers in  
14  
15 338 administering dual RDTs. However, RDT are easy to use and can be administered by a lay provider, and  
16  
17 339 rapid results can minimize loss to follow-up. Overall, dual RDTs have been shown to have adequate  
18  
19  
20 340 performance in field settings in Viet Nam among key populations.[50] Dual RDTs may also increase HIV  
21  
22 341 test coverage as they can be easily conducted by community health workers outside of healthcare settings,  
23  
24 342 and they may be more acceptable to some members of key populations who are concerned about stigma  
25  
26  
27 343 associated with testing.[51] Dual RDTs may also expand syphilis testing uptake, as most syphilis cases in  
28  
29 344 Viet Nam are currently diagnosed at provincial hospitals. Despite this, some additional training,  
30  
31 345 supervision, and support will be needed to scale-up dual RDT use among key populations.

32  
33  
34 346 We did not explicitly model HIV testing or diagnosis in this analysis as HIV testing uptake is not an  
35  
36 347 adjustable model parameter in Spectrum. We instead modeled ART coverage, which required assumptions  
37  
38  
39 348 about the link between testing frequency and ART coverage. Since data on the impact of retesting on  
40  
41 349 population HIV incidence is limited, we made conservative assumptions about the frequency of linkage  
42  
43 350 to care and ART use following retesting. We assumed that HIV testing frequency would increase in Viet  
44  
45  
46 351 Nam among key populations in the baseline scenario but testing frequency would increase more quickly  
47  
48 352 under the other scenarios. Because of this, we believe our estimates of the impact of increased testing  
49  
50 353 frequency are conservative. Due to the lack of evidence on the impact of retesting on population HIV  
51  
52 354 incidence, a model that explicitly includes testing rates as a parameter would also need to rely on  
53  
54  
55 355 assumptions concerning the relationship between testing behavior and ART enrollment.

1  
2  
3 356 Some model assumptions regarding the timing of HIV and syphilis testing may be inaccurate. Timing of  
4  
5 357 testing is an important component from both a technical analytic perspective and guideline development  
6  
7  
8 358 process. In truth, there are a nearly limitless number of permutations of frequency and spacing of retests.  
9  
10 359 We chose even spacing as it is easily interpretable at all levels of research, policy, and service delivery.  
11  
12 360 This maximal spacing between tests is expected to have the largest impact at the population-level,  
13  
14  
15 361 assuming risk is evenly spread across the calendar year. We assume regular testing intervals for the entire  
16  
17 362 population in each scenario, but it is possible – and entirely sensible – for people who had a risky sexual  
18  
19 363 encounter or who are experiencing symptoms to seek more frequent retesting than biannually. We  
20  
21  
22 364 assumed in scenarios that included a dual RDT, additional syphilis screening tests would not be conducted.  
23  
24 365 However, PLWH who know their status and present for syphilis screening do not need an HIV test.  
25  
26  
27 366 We did not include the costs of outreach to achieve increased test coverage of key populations.  
28  
29 367 Considerable expansions of first time testing among MSM in Viet Nam have recently been achieved  
30  
31 368 through social media campaigns, perhaps providing a guide for cost-effectively increasing testing uptake  
32  
33  
34 369 among key populations.[49, 52] We also did not consider the burden that increased test coverage and  
35  
36 370 frequency may have on the health system; however, as testing may be conducted effectively using lay  
37  
38 371 providers, increased testing may not substantially impact the provision of other services.[51] Although  
39  
40  
41 372 targeting key populations in lower prevalence regions may be more difficult and costly, these results are  
42  
43 373 robust to increased costs and it will likely remain an effective use of resources. Research that focuses on  
44  
45 374 province-specific estimates of cost and impact would likely find that focusing on high-burden areas is  
46  
47 375 more cost-effective; however, health policy, financing, guideline development, and implementation  
48  
49  
50 376 continue to be led nationally in Viet Nam. Therefore, national-level evidence is needed to direct decision  
51  
52 377 making.  
53  
54  
55  
56  
57  
58  
59  
60

1  
2  
3 378 We assume that syphilis screening will not impact syphilis prevalence rates. Increased screening may  
4  
5 379 reduce prevalence by increasing early treatment, but syphilis screening also has the potential to increase  
6  
7  
8 380 prevalence as individuals with latent syphilis are unlikely to transmit the infection to others unless they  
9  
10 381 are treated and then infected again. Thus, we believe our estimates of infections averted and cost-  
11  
12 382 effectiveness are conservative. Finally, there is limited data on population size, HIV and syphilis  
13  
14  
15 383 prevalence, and health seeking behaviors among key populations. We based our model input on estimates  
16  
17 384 included in published literature as well as Viet Nam country sources.  
18  
19

## 20 385 **CONCLUSIONS**

21  
22  
23 386 Our study suggests that annual or biannual HIV and syphilis testing among key populations in Viet Nam  
24  
25 387 using a dual RDT will increase HIV and syphilis detection and treatment, while remaining cost-saving or  
26  
27 388 cost-effective. Integrating HIV and other STI testing can streamline services as well as expand testing and  
28  
29 389 help countries with epidemics concentrated in key populations reach 95-95-95 targets. Future collection  
30  
31  
32 390 of empirical data, including conducting budget impact studies, would be useful to determine the impact  
33  
34 391 of HIV and syphilis screening among key populations on ART uptake as well as HIV and syphilis  
35  
36 392 incidence, particularly in concentrated HIV epidemics.  
37  
38

## 39 393 **COMPETING INTERESTS**

40  
41  
42 394 The authors declare no competing interests.  
43  
44 395  
45

## 46 396 **FUNDING SOURCE**

47  
48  
49 397 WHO-USAID: GHA-G-00-09-00003; NIH/NIAID: K01 AI116298  
50  
51

## 52 398 **CONTRIBUTORSHIP STATEMENT**

53  
54 399 CJ and AD devised the project and the main conceptual ideas. DC, DG, and RB parameterized the model.  
55  
56  
57  
58  
59  
60

1  
2  
3  
4  
5  
6  
7  
8  
9  
10  
11  
12  
13  
14  
15  
16  
17  
18  
19  
20  
21  
22  
23  
24  
25  
26  
27  
28  
29  
30  
31  
32  
33  
34  
35  
36  
37  
38  
39  
40  
41  
42  
43  
44  
45  
46  
47  
48  
49  
50  
51  
52  
53  
54  
55  
56  
57  
58  
59  
60

400 DC and DG carried out the model implementation. VN and SVH provided model feedback. All authors,  
401 including DC, DG, RB, MS, MBD, MSJ, RB, MNO, VM, VN, SVH, MMT, TEW, CJ, and AD, provided  
402 critical feedback and helped shape the research, analysis, and manuscript.

#### **DATA SHARING STATEMENT**

Extra data is available by emailing David Coomes, [dcoomes@uw.edu](mailto:dcoomes@uw.edu)

#### **ETHICS APPROVAL**

This study did not receive nor require ethics approval as it does not involve human or animal participants.

## References

- 1  
2  
3 407  
4  
5 408 [1] UNAIDS Joint United Nations Programme on HIV/AIDS. *Global AIDS update 2019 - Communities*  
6  
7 409 *at the centre*. Geneva, <https://www.unaids.org/en/resources/documents/2019/2019-global->  
8  
9 410 *AIDS-update (2019)*.
- 10  
11 411 [2] UNAIDS Joint United Nations Programme on HIV/AIDS. *Global AIDS Update 2020: Seizing the*  
12  
13 412 *moment*. Geneva, <https://www.unaids.org/en/resources/documents/2020/global-aids-report>  
14  
15 413 *(2020)*.
- 16  
17 414 [3] Cameron CE. Syphilis Vaccine Development: Requirements, Challenges, and Opportunities. *Sex*  
18  
19 415 *Transm Dis* 2018; 45: S17.
- 20  
21 416 [4] Tsuboi M, Evans J, Davies E, et al. Prevalence of syphilis among men who have sex with men: A  
22  
23 417 global systematic review and meta-analysis from 2000 to 2020. *Lancet Glob Heal*; In press.
- 24  
25  
26 418 [5] World Health Organization. *Consolidated guidelines on HIV testing services*. Geneva,  
27  
28 419 <https://www.ncbi.nlm.nih.gov/books/NBK316021/> (2015).
- 29  
30 420 [6] World Health Organization. *WHO Guideline on Syphilis screening and treatment for pregnant*  
31  
32 421 *women*, [https://www.who.int/reproductivehealth/publications/rtis/syphilis-ANC-](https://www.who.int/reproductivehealth/publications/rtis/syphilis-ANC-screenandtreat-guidelines/en/)  
33  
34 422 *screenandtreat-guidelines/en/* (2017).
- 35  
36 423 [7] Rodriguez P, Roberts DA, Meisner J, et al. Cost-effectiveness of dual maternal HIV and syphilis  
37  
38 424 testing strategies in high and low HIV prevalence countries: a modeling study. *Lancet Glob Heal*  
39  
40 425 2021; 9: E61–E71.
- 41  
42  
43 426 [8] World Health Organization. *Consolidated Guidelines on the Use of Antiretroviral Drugs for*  
44  
45 427 *Treating and Preventing HIV Infection*. 2016. Epub ahead of print 2016. DOI:  
46 428 10.1017/CBO9781107415324.004.
- 47  
48  
49 429 [9] UNAIDS. *90-90-90 An ambitious treatment target to help end the AIDS epidemic*,  
50  
51 430 <https://www.unaids.org/en/resources/909090> (2016).
- 52  
53 431 [10] Hakim AJ, MacDonald V, Hladik W, et al. Gaps and opportunities: measuring the key population  
54  
55 432 cascade through surveys and services to guide the HIV response. *J Int AIDS Soc* 2018; 21:

- 1  
2  
3 433 e25119.  
4  
5  
6 434 [11] World Health Organization. *Global Health Sector Strategy on Sexually Transmitted Infections*  
7  
8 435 2016-2021, <https://www.who.int/reproductivehealth/publications/rtis/ghss-stis/en/> (2016).  
9  
10 436 [12] World Health Organization. Global Health Observatory data repository: Data on syphilis,  
11  
12 437 <https://apps.who.int/gho/data/node.main.A1357STI?lang=en> (accessed 4 June 2020).  
13  
14 438 [13] Stover J, Brown T, Puckett R, et al. Updates to the Spectrum/Estimations and Projections  
15  
16 439 Package model for estimating trends and current values for key HIV indicators. *AIDS* 2017; 31:  
17  
18 440 S5–S11.  
19  
20 441 [14] Tuite AR, Testa C, Rönn M, et al. Exploring how epidemic context influences syphilis screening  
21  
22 442 impact: A mathematical modeling study. *Sex Transm Dis*; 47. Epub ahead of print 2020. DOI:  
23  
24 443 10.1097/OLQ.0000000000001249.  
25  
26 444 [15] Tuite A, Fisman D. Go big or go home: Impact of screening coverage on syphilis infection  
27  
28 445 dynamics. *Sex Transm Infect*; 92. Epub ahead of print 2016. DOI: 10.1136/sextrans-2014-052001.  
29  
30  
31 446 [16] Clatts MC, Goldsamt LA, Giang LM, et al. Sexually transmissible infection and HIV prevention and  
32  
33 447 treatment for young male sex workers in Vietnam: Findings from the SHEATH intervention. *Sex*  
34  
35 448 *Health*. Epub ahead of print 2016. DOI: 10.1071/SH16051.  
36  
37 449 [17] Bao A, Colby DJ, Trang T, et al. Correlates of HIV Testing Among Transgender Women in Ho Chi  
38  
39 450 Minh, Vietnam. *AIDS Behav*. Epub ahead of print 2016. DOI: 10.1007/s10461-016-1574-8.  
40  
41 451 [18] Justimus P, Colby D, Mai Doan Anh T, et al. Willingness to use the Internet to seek information  
42  
43 452 on HIV prevention and care among men who have sex with men in Ho Chi Minh City, Vietnam.  
44  
45 453 *PLoS One* 2013; 8: e71471.  
46  
47 454 [19] Nguyen TA, Hoang LT, Pham VQ, et al. Risk factors for HIV-1 seropositivity in drug users under 30  
48  
49 455 years old in Haiphong, Vietnam. *Addiction* 2001; 96: 405–413.  
50  
51  
52 456 [20] Ngo AD, Ratliff EA, Mccurdy SA, et al. Health-seeking behaviour for sexually transmitted  
53  
54 457 infections and HIV testing among female sex workers in Vietnam. *AIDS Care - Psychol Socio-*  
55  
56 458 *Medical Asp AIDS/HIV* 2007; 19: 878–887.  
57  
58  
59  
60

- 1  
2  
3 459 [21] Magnani R, Riono P, Nurhayati, et al. Sexual risk behaviours, HIV and other sexually transmitted  
4 infections among female sex workers in Indonesia. *Sex Transm Infect*. Epub ahead of print 2010.  
5 460 DOI: 10.1136/sti.2009.038059.  
6  
7 461  
8  
9 462 [22] Cassini A, Colzani E, Pini A, et al. Impact of infectious diseases on population health using  
10 incidence-based disability-adjusted life years (DALYs): Results from the burden of communicable  
11 463 diseases in Europe study, European Union and European economic countries, 2009 to 2013.  
12 *Eurosurveillance*. Epub ahead of print 2018. DOI: 10.2807/1560-7917.ES.2018.23.16.17-00454.  
13 464  
14  
15 465  
16  
17 466 [23] World Health Organization. *Consolidated guidelines on HIV testing services*. Geneva,  
18 <https://www.who.int/publications/i/item/978-92-4-155058-1> (2019).  
19 467  
20  
21  
22 468 [24] Feldman J, Mishra S. What could re-infection tell us about R0? A modeling case-study of syphilis  
23 transmission. *Infect Dis Model* 2019; 4: 257–264.  
24 469  
25  
26 470 [25] Edejer TT-T, Baltussen R, Adam T, et al. *Making choices in health: WHO guide to cost*  
27 *effectiveness analysis*. World Health Organization, 2003.  
28 471  
29  
30 472 [26] World Bank. World Bank Data: GDP per capita (current US\$) - Vietnam,  
31 <https://data.worldbank.org/indicator/NY.GDP.PCAP.CD?locations=VN> (accessed 16 December  
32 473 2020).  
33  
34 474  
35  
36 475 [27] Ong JJ, Fu H, Smith MK, et al. Expanding syphilis testing: a scoping review of syphilis testing  
37 interventions among key populations. *Expert Rev Anti Infect Ther* 2018; 16: 423–432.  
38 476  
39  
40  
41 477 [28] UNAIDS Joint United Nations Programme on HIV/AIDS, WHO. *Laws and Policies Analytics*.  
42  
43 478 [29] U.S. President’s Emergency Plan for AIDS Relief (PEPFAR). *PEPFAR 2021 Country and Regional*  
44 *Operational Plan (COP/ROP) Guidance for all PEPFAR Countries*, [https://www.state.gov/wp-](https://www.state.gov/wp-content/uploads/2020/12/PEPFAR-COP21-Guidance-Final.pdf)  
45 479 [content/uploads/2020/12/PEPFAR-COP21-Guidance-Final.pdf](https://www.state.gov/wp-content/uploads/2020/12/PEPFAR-COP21-Guidance-Final.pdf) (2021).  
46  
47 480  
48  
49 481 [30] The Global Fund. *List of HIV Diagnostic test kits and equipments classified according to the*  
50 *Global Fund Quality Assurance Policy*,  
51 482 [https://www.theglobalfund.org/media/5878/psm\\_productshiv-who\\_list\\_en.pdf](https://www.theglobalfund.org/media/5878/psm_productshiv-who_list_en.pdf) (2021).  
52  
53 483  
54  
55 484 [31] Broyles LN, Boeras D, Peeling RW. Implementation of dual maternal HIV-Syphilis testing: The  
56  
57  
58  
59  
60

1

2

3 485 devil is in the details. *Lancet Glob Heal* 2021; 9: e595.

4

5

6 486 [32] Nguyen V, Anh L, Thong N, et al. High prevalence of HIV, syphilis and HCV among key

7 487 populations and partners: results from an integrated multiple diseases testing led by community

8

9 488 in Viet Nam. In: *Poster exhibition IAS 2019*. Mexico City, Mexico, 2019.

10

11

12 489 [33] Granich RM, Gilks CF, Dye C, et al. Universal voluntary HIV testing with immediate antiretroviral

13

14 490 therapy as a strategy for elimination of HIV transmission: a mathematical model. *Lancet* 2009;

15

16 491 373: 48–57.

17

18 492 [34] Eaton JW, Johnson LF, Salomon JA, et al. HIV treatment as prevention: Systematic comparison of

19

20 493 mathematical models of the potential impact of antiretroviral therapy on HIV incidence in South

21

22 494 Africa. *PLoS Med*; 9. Epub ahead of print July 2012. DOI: 10.1371/journal.pmed.1001245.

23

24 495 [35] UNAIDS. AIDSinfo | UNAIDS, <https://aidsinfo.unaids.org/> (accessed 27 May 2020).

25

26

27 496 [36] Iwuji CC, Orne-Gliemann J, Larmarange J, et al. Universal test and treat and the HIV epidemic in

28

29 497 rural South Africa: a phase 4, open-label, community cluster randomised trial. *Lancet HIV* 2018;

30

31 498 5: e116–e125.

32

33 499 [37] Makhema J, Wirth KE, Pretorius Holme M, et al. Universal Testing, Expanded Treatment, and

34

35 500 Incidence of HIV Infection in Botswana. *N Engl J Med* 2019; 381: 230–242.

36

37 501 [38] Havlir D V., Balzer LB, Charlebois ED, et al. HIV Testing and Treatment with the Use of a

38

39 502 Community Health Approach in Rural Africa. *N Engl J Med* 2019; 381: 219–229.

40

41 503 [39] Hayes RJ, Donnell D, Floyd S, et al. Effect of Universal Testing and Treatment on HIV Incidence —

42

43 504 HPTN 071 (PopART). *N Engl J Med* 2019; 381: 207–218.

44

45 505 [40] Akullian A, Bershteyn A, Jewell B, et al. The missing 27%. *AIDS* 2017; 31: 2427–2429.

46

47 506 [41] Abdool Karim SS. HIV-1 Epidemic Control — Insights from Test-and-Treat Trials. *N Engl J Med*

48

49 507 2019; 381: 286–288.

50

51 508 [42] Swartzendruber A, Steiner RJ, Adler MR, et al. Introduction of rapid syphilis testing in antenatal

52

53 509 care: A systematic review of the impact on HIV and syphilis testing uptake and coverage. *Int J*

54

55

56

57

58

59

60

1  
2  
3  
4  
5  
6  
7  
8  
9  
10  
11  
12  
13  
14  
15  
16  
17  
18  
19  
20  
21  
22  
23  
24  
25  
26  
27  
28  
29  
30  
31  
32  
33  
34  
35  
36  
37  
38  
39  
40  
41  
42  
43  
44  
45  
46  
47  
48  
49  
50  
51  
52  
53  
54  
55  
56  
57  
58  
59  
60

*Gynecol Obstet* 2015; 130: S15–S21.

- [43] Gliddon HD, Peeling RW, Kamb ML, et al. A systematic review and meta-analysis of studies evaluating the performance and operational characteristics of dual point-of-care tests for HIV and syphilis. *Sex Transm Infect* 2017; 93: S3–S15.
- [44] Kato M, Long NH, Duong BD, et al. Enhancing the Benefits of Antiretroviral Therapy in Vietnam: Towards Ending AIDS. *Curr HIV/AIDS Rep* 2014; 11: 487–495.
- [45] Kato M, Granich R, Bui DD, et al. The potential impact of expanding antiretroviral therapy and combination prevention in Vietnam: Towards elimination of HIV transmission. *J Acquir Immune Defic Syndr*. Epub ahead of print 2013. DOI: 10.1097/QAI.0b013e31829b535b.
- [46] Kazemian P, Costantini S, Kumarasamy N, et al. The Cost-effectiveness of Human Immunodeficiency Virus (HIV) Preexposure Prophylaxis and HIV Testing Strategies in High-risk Groups in India. *Clin Infect Dis* 2020; 70: 633–642.
- [47] Cipriano LE, Zaric GS, Holodniy M, et al. Cost Effectiveness of Screening Strategies for Early Identification of HIV and HCV Infection in Injection Drug Users. *PLoS One* 2012. DOI: 10.1371/journal.pone.0045176.
- [48] Reitsema M, Steffers L, Visser M, et al. Cost-Effectiveness of Increased HIV Testing among MSM in The Netherlands. *AIDS* 2019; 33: 1807–1817.
- [49] Green KE, Vu BN, Phan HT, et al. From conventional to disruptive: upturning the HIV testing status quo among men who have sex with men in Vietnam. *J Int AIDS Soc* 2018; 21: e25127.
- [50] Withers K, Bristow C, Nguyen M, et al. A field evaluation of a rapid dual immunoassay for human immunodeficiency virus and syphilis antibodies, Hanoi, Vietnam. *Int J STD AIDS* 2019; 30: 173–180.
- [51] Vu BN, Green KE, Phan HTT, et al. Lay provider HIV testing: A promising strategy to reach the undiagnosed key populations in Vietnam. *PLoS One* 2018; 13: e0210063.
- [52] Nguyen VTT, Phan HTT, Kato M, et al. Community-led HIV testing services including HIV self-testing and assisted partner notification services in Vietnam: lessons from a pilot study in a

1  
2  
3  
4  
5  
6  
7  
8  
9  
10  
11  
12  
13  
14  
15  
16  
17  
18  
19  
20  
21  
22  
23  
24  
25  
26  
27  
28  
29  
30  
31  
32  
33  
34  
35  
36  
37  
38  
39  
40  
41  
42  
43  
44  
45  
46  
47  
48  
49  
50  
51  
52  
53  
54  
55  
56  
57  
58  
59  
60

536 concentrated epidemic setting. *J Int AIDS Soc* 2019; 22: e25301.

For peer review only

1  
2  
3 538 **FIGURE LEGENDS**  
4

5 539 **Figure 1. Efficiency frontier presenting the total disability adjusted life years (DALYs) and costs for**  
6 540 **five testing scenarios among key populations.** The solid line indicates the scenarios that are not  
7 541 dominated by other scenarios. Dominated indicates that a scenario is either more costly and less effective  
8 542 or has a higher ICER than a scenario that is more effective. The ICERs for the non-dominated scenarios  
9 543 are shown. DALYs=disability adjusted life-years, ICER=incremental cost-effectiveness ratio, RDT=rapid  
10 544 diagnostic test, USD=United States dollars

12 545  
13  
14 546  
15  
16 547  
17 548 **Figure 2. Sensitivity analysis of non-dominated scenarios using a Monte Carlo simulation of the**  
18 549 **cost effectiveness of HIV/syphilis dual testing among key populations in Viet Nam.** Plot shows 10,000  
19 550 iterations in which 17 key parameters were randomly adjusted. All points below the green line are cost-  
20 551 effective at \$2,715 per DALY averted and those below the solid black line (y-intercept) are cost-saving.  
22 552 Only non-dominated scenarios are shown in this figure; cost-effectiveness of *1 Dual Test* is compared to  
23 553 baseline, *1 HIV Test & 1 Dual Test* is compared to *1 Dual Test*, and *2 Dual Tests* is compared to *1 HIV*  
24 554 *Test & 1 Dual Test*. DALYs=disability adjusted life-years, ICER=incremental cost-effectiveness ratio,  
25 555 RDT=rapid diagnostic test, USD=United States dollars.  
26

1  
2  
3  
4  
5  
6  
7  
8  
9  
10  
11  
12  
13  
14  
15  
16  
17  
18  
19  
20  
21  
22  
23  
24  
25  
26  
27  
28  
29  
30  
31  
32  
33  
34  
35  
36  
37  
38  
39  
40  
41  
42  
43  
44  
45  
46  
47  
48  
49  
50  
51  
52  
53  
54  
55  
56  
57  
58  
59  
60



Figure 1. Efficiency frontier presenting the total disability adjusted life years (DALYs) and costs for five testing scenarios among key populations. The solid line indicates the scenarios that are not dominated by other scenarios. Dominated indicates that a scenario is either more costly and less effective or has a higher ICER than a scenario that is more effective. The ICERs for the non-dominated scenarios are shown. DALYs=disability adjusted life-years, ICER=incremental cost-effectiveness ratio, RDT=rapid diagnostic test, USD=United States dollars

2116x1058mm (72 x 72 DPI)



Figure 2. Sensitivity analysis of non-dominated scenarios using a Monte Carlo simulation of the cost effectiveness of HIV/syphilis dual testing among key populations in Viet Nam. Plot shows 10,000 iterations in which 17 key parameters were randomly adjusted. All points below the green line are cost-effective at \$2,715 per DALY averted and those below the solid black line (y-intercept) are cost-saving. Only non-dominated scenarios are shown in this figure; cost-effectiveness of 1 Dual Test is compared to baseline, 1 HIV Test & 1 Dual Test is compared to 1 Dual Test, and 2 Dual Tests is compared to 1 HIV Test & 1 Dual Test. DALYs=disability adjusted life-years, ICER=incremental cost-effectiveness ratio, RDT=rapid diagnostic test, USD=United States dollars.

2116x1058mm (72 x 72 DPI)

1  
2  
3 **Cost-effectiveness of implementing HIV and HIV/syphilis dual testing among key**  
4 **populations in Viet Nam: a modeling analysis**  
5

6  
7 **Supplemental material**  
8

9  
10  
11 Table S1: Parameters and probability distributions for Monte Carlo simulation

12  
13 Table S2: Sensitivity analysis of all scenarios using a Monte Carlo simulation

14  
15 Figure S1: Estimated yearly HIV incidence under baseline, annual, and biannual HIV testing

16  
17 Figure S2: Cost pressure analysis of testing scenarios  
18  
19  
20  
21  
22  
23  
24  
25  
26  
27  
28  
29  
30  
31  
32  
33  
34  
35  
36  
37  
38  
39  
40  
41  
42  
43  
44  
45  
46  
47  
48  
49  
50  
51  
52  
53  
54  
55  
56  
57  
58  
59  
60

**Table S1. Parameters and probability distributions for Monte Carlo simulation.** Table shows the baseline model parameter values and the probability distributions used for random draws of 17 variables for 10,000 Monte Carlo simulations. Beta distributions were used for all proportion parameters. For the beta distribution, the alpha and beta parameters were calculated as the baseline value multiplied by 100, except for the *impact* parameter where an alpha and beta of 25 was used. Gamma distributions were used for all other parameters. For the gamma distribution, the alpha parameter was calculated as the square of the baseline parameter divided by the square of the standard deviation. The beta parameter was calculated as the square of the standard deviation divided by the baseline parameter.

| <b>Model Parameter</b>                        | <b>Baseline value</b> | <b>Distribution</b> | <b>St. Dev</b> | <b>alpha/beta</b> |
|-----------------------------------------------|-----------------------|---------------------|----------------|-------------------|
| <b>Baseline HIV test acceptance</b>           | 50%                   | Beta                | N/A            | 50                |
| <b>Recommended test acceptance</b>            | 75%                   | Beta                | N/A            | 75                |
| <b>Additional test drop off rate</b>          | 10%                   | Beta                | N/A            | 10                |
| <b>HIV Lay Test Cost</b>                      | \$4.50                | Gamma               | \$3.00         | N/A               |
| <b>Syphilis RPR1 Cost</b>                     | \$6.28                | Gamma               | \$3.50         | N/A               |
| <b>Syphilis TPHA Cost</b>                     | \$10.26               | Gamma               | \$5.00         | N/A               |
| <b>HIV/Syphilis Dual Test Cost</b>            | \$6.50                | Gamma               | \$3.50         | N/A               |
| <b>ART Treatment Cost</b>                     | \$285                 | Gamma               | \$50           | N/A               |
| <b>Syphilis Treatment Cost</b>                | \$6.50                | Gamma               | \$3.50         | N/A               |
| <b>Avg Years on ART</b>                       | 25                    | Gamma               | 3              | N/A               |
| <b>Time Horizon</b>                           | 2035                  | Gamma               | 3              | N/A               |
| <b>Impact</b>                                 | 100%                  | Beta                | N/A            | 25                |
| <b>Baseline Syphilis test acceptance FSW</b>  | 35%                   | Beta                | N/A            | 35                |
| <b>Baseline syphilis test acceptance MSM</b>  | 27%                   | Beta                | N/A            | 27                |
| <b>Baseline syphilis test acceptance PWID</b> | 16%                   | Beta                | N/A            | 16                |
| <b>Baseline syphilis prevalence FSW</b>       | 2.1%                  | Beta                | N/A            | 2.1               |
| <b>Baseline syphilis prevalence MSM</b>       | 6.7%                  | Beta                | N/A            | 6.7               |
| <b>Baseline syphilis prevalence PWID</b>      | 0.3%                  | Beta                | N/A            | 0.3               |

**Table S2. Sensitivity analysis of all scenarios using a Monte Carlo simulation.** Table shows the percentage of simulations (10,000 iterations) in which each scenario is cost-effective (at \$500 or \$2,715 per DALY averted), cost-saving, or less-effective. Less effective scenarios are both less effective and more costly as compared to the scenario above. Scenarios are arranged in order of increasing cost and each scenario is compared to the one immediately above; 1 Dual HIV/syphilis RDT is compared to the baseline scenario.

| Scenario                            | Cost-effective | Cost-effective | Cost-saving | Less effective |
|-------------------------------------|----------------|----------------|-------------|----------------|
|                                     | (\$500)        | (\$2,715)      |             |                |
| 1 Dual HIV/syphilis RDT             | 85%            | 100%           | 52%         | 0%             |
| 1 HIV RDT                           | 1%             | 1%             | 1%          | 98%            |
| 1 Dual HIV/syphilis RDT & 1 HIV RDT | 32%            | 84%            | 18%         | 0%             |
| 2 HIV RDTs                          | 1%             | 1%             | 1%          | 98%            |
| 2 Dual HIV/syphilis RDTs            | 45%            | 52%            | 44%         | 0%             |

DALY=disability adjusted life-year, RDT=rapid diagnostic test

**Figure S1. Estimated yearly HIV incidence under baseline, annual, and biannual HIV testing.**

Figure shows modeled incidence under each scenario for the entire adult population of Viet Nam. The baseline scenario assumes 95% ART coverage among PLWH by 2028 (4.8% increase per year). Annual HIV testing models a 6.0% ART coverage increase per year, and biannual testing models a 7.2% ART coverage increase per year. Maximum test coverage is 95% for each model. All models assume ART coverage of 66% of men and 72% of women living with HIV in 2020. Scenarios are implemented in 2020 and modeled through 2035.



**Figure S2. Cost pressure analysis of testing scenarios.** Figure shows the discounted cost over time of each scenario. Costs are discounted 3% with a time horizon from 2020 – 2035. Baseline costs include testing costs assuming that 50% of key populations are tested for HIV each year and syphilis testing rates are specific to each sub-population (FSW, MSM, and PWID), and syphilis treatment costs. All other scenarios include the cost of HIV treatment averted compared to the baseline scenario, testing costs, and syphilis treatment costs. Scenarios including one test per year assume a 75% test acceptance rate, and those that include two tests per year assume a 75% test acceptance rate for the first test, and a 68.5% test acceptance rate for the second test. Each scenario refers to the number of tests per year. RDT=rapid diagnostic test, USD=United States dollars



**CHEERS Checklist**

**Items to include when reporting economic evaluations of health interventions**

The **ISPOR CHEERS Task Force Report**, *Consolidated Health Economic Evaluation Reporting Standards (CHEERS)—Explanation and Elaboration: A Report of the ISPOR Health Economic Evaluations Publication Guidelines Good Reporting Practices Task Force*, provides examples and further discussion of the 24-item CHEERS Checklist and the CHEERS Statement. It may be accessed via the *Value in Health* or via the ISPOR Health Economic Evaluation Publication Guidelines – CHEERS: Good Reporting Practices webpage: <http://www.ispor.org/TaskForces/EconomicPubGuidelines.asp>

| Section/item                    | Item No | Recommendation                                                                                                                                                                             | Reported on page No/line No |
|---------------------------------|---------|--------------------------------------------------------------------------------------------------------------------------------------------------------------------------------------------|-----------------------------|
| <b>Title and abstract</b>       |         |                                                                                                                                                                                            |                             |
| Title                           | 1       | Identify the study as an economic evaluation or use more specific terms such as “cost-effectiveness analysis”, and describe the interventions compared.                                    | Line 1                      |
| Abstract                        | 2       | Provide a structured summary of objectives, perspective, setting, methods (including study design and inputs), results (including base case and uncertainty analyses), and conclusions.    | Page 2                      |
| <b>Introduction</b>             |         |                                                                                                                                                                                            |                             |
| Background and objectives       | 3       | Provide an explicit statement of the broader context for the study.<br>Present the study question and its relevance for health policy or practice decisions.                               | Page 4                      |
| <b>Methods</b>                  |         |                                                                                                                                                                                            |                             |
| Target population and subgroups | 4       | Describe characteristics of the base case population and subgroups analysed, including why they were chosen.                                                                               | Page 4 - 5                  |
| Setting and location            | 5       | State relevant aspects of the system(s) in which the decision(s) need(s) to be made.                                                                                                       | Page 4                      |
| Study perspective               | 6       | Describe the perspective of the study and relate this to the costs being evaluated.                                                                                                        | Page 6-7                    |
| Comparators                     | 7       | Describe the interventions or strategies being compared and state why they were chosen.                                                                                                    | Page 7                      |
| Time horizon                    | 8       | State the time horizon(s) over which costs and consequences are being evaluated and say why appropriate.                                                                                   | Line 165                    |
| Discount rate                   | 9       | Report the choice of discount rate(s) used for costs and outcomes and say why appropriate.                                                                                                 | Line 166                    |
| Choice of health outcomes       | 10      | Describe what outcomes were used as the measure(s) of benefit in the evaluation and their relevance for the type of analysis performed.                                                    | Line 164                    |
| Measurement of effectiveness    | 11a     | <i>Single study-based estimates:</i> Describe fully the design features of the single effectiveness study and why the single study was a sufficient source of clinical effectiveness data. | NA                          |



|    |                         |     |                                                                                                                                                                                                                                                                                                                                                       |          |
|----|-------------------------|-----|-------------------------------------------------------------------------------------------------------------------------------------------------------------------------------------------------------------------------------------------------------------------------------------------------------------------------------------------------------|----------|
| 1  |                         | 11b | <i>Synthesis-based estimates:</i> Describe fully the methods used for identification of included studies and synthesis of clinical effectiveness data.                                                                                                                                                                                                | Page 6   |
| 2  |                         |     |                                                                                                                                                                                                                                                                                                                                                       |          |
| 3  |                         |     |                                                                                                                                                                                                                                                                                                                                                       |          |
| 4  | Measurement and         | 12  | If applicable, describe the population and methods used to elicit preferences for outcomes.                                                                                                                                                                                                                                                           | Line 110 |
| 5  | valuation of preference |     |                                                                                                                                                                                                                                                                                                                                                       |          |
| 6  | based outcomes          |     |                                                                                                                                                                                                                                                                                                                                                       |          |
| 7  |                         |     |                                                                                                                                                                                                                                                                                                                                                       |          |
| 8  | Estimating resources    | 13a | <i>Single study-based economic evaluation:</i> Describe approaches used to estimate resource use associated with the alternative interventions. Describe primary or secondary research methods for valuing each resource item in terms of its unit cost. Describe any adjustments made to approximate to opportunity costs.                           | NA       |
| 9  | and costs               |     |                                                                                                                                                                                                                                                                                                                                                       |          |
| 10 |                         |     |                                                                                                                                                                                                                                                                                                                                                       |          |
| 11 |                         |     |                                                                                                                                                                                                                                                                                                                                                       |          |
| 12 |                         |     |                                                                                                                                                                                                                                                                                                                                                       |          |
| 13 |                         |     |                                                                                                                                                                                                                                                                                                                                                       |          |
| 14 |                         |     |                                                                                                                                                                                                                                                                                                                                                       |          |
| 15 |                         | 13b | <i>Model-based economic evaluation:</i> Describe approaches and data sources used to estimate resource use associated with model health states. Describe primary or secondary research methods for valuing each resource item in terms of its unit cost. Describe any adjustments made to approximate to opportunity costs.                           | Page 6   |
| 16 |                         |     |                                                                                                                                                                                                                                                                                                                                                       |          |
| 17 |                         |     |                                                                                                                                                                                                                                                                                                                                                       |          |
| 18 |                         |     |                                                                                                                                                                                                                                                                                                                                                       |          |
| 19 |                         |     |                                                                                                                                                                                                                                                                                                                                                       |          |
| 20 |                         |     |                                                                                                                                                                                                                                                                                                                                                       |          |
| 21 |                         |     |                                                                                                                                                                                                                                                                                                                                                       |          |
| 22 | Currency, price date,   | 14  | Report the dates of the estimated resource quantities and unit costs. Describe methods for adjusting estimated unit costs to the year of reported costs if necessary. Describe methods for converting costs into a common currency base and the exchange rate.                                                                                        | Page 6   |
| 23 | and conversion          |     |                                                                                                                                                                                                                                                                                                                                                       |          |
| 24 |                         |     |                                                                                                                                                                                                                                                                                                                                                       |          |
| 25 |                         |     |                                                                                                                                                                                                                                                                                                                                                       |          |
| 26 |                         |     |                                                                                                                                                                                                                                                                                                                                                       |          |
| 27 |                         |     |                                                                                                                                                                                                                                                                                                                                                       |          |
| 28 | Choice of model         | 15  | Describe and give reasons for the specific type of decision-analytical model used. Providing a figure to show model structure is strongly recommended.                                                                                                                                                                                                | Page 6   |
| 29 |                         |     |                                                                                                                                                                                                                                                                                                                                                       |          |
| 30 |                         |     |                                                                                                                                                                                                                                                                                                                                                       |          |
| 31 | Assumptions             | 16  | Describe all structural or other assumptions underpinning the decision-analytical model.                                                                                                                                                                                                                                                              | Page 7-8 |
| 32 |                         |     |                                                                                                                                                                                                                                                                                                                                                       |          |
| 33 |                         |     |                                                                                                                                                                                                                                                                                                                                                       |          |
| 34 | Analytical methods      | 17  | Describe all analytical methods supporting the evaluation. This could include methods for dealing with skewed, missing, or censored data; extrapolation methods; methods for pooling data; approaches to validate or make adjustments (such as half cycle corrections) to a model; and methods for handling population heterogeneity and uncertainty. | Page 8   |
| 35 |                         |     |                                                                                                                                                                                                                                                                                                                                                       |          |
| 36 |                         |     |                                                                                                                                                                                                                                                                                                                                                       |          |
| 37 |                         |     |                                                                                                                                                                                                                                                                                                                                                       |          |
| 38 |                         |     |                                                                                                                                                                                                                                                                                                                                                       |          |
| 39 |                         |     |                                                                                                                                                                                                                                                                                                                                                       |          |
| 40 |                         |     |                                                                                                                                                                                                                                                                                                                                                       |          |
| 41 |                         |     |                                                                                                                                                                                                                                                                                                                                                       |          |
| 42 | <b>Results</b>          |     |                                                                                                                                                                                                                                                                                                                                                       |          |
| 43 | Study parameters        | 18  | Report the values, ranges, references, and, if used, probability distributions for all parameters. Report reasons or sources for distributions used to represent uncertainty where appropriate. Providing a table to show the input values is strongly recommended.                                                                                   | Table 1  |
| 44 |                         |     |                                                                                                                                                                                                                                                                                                                                                       |          |
| 45 |                         |     |                                                                                                                                                                                                                                                                                                                                                       |          |
| 46 |                         |     |                                                                                                                                                                                                                                                                                                                                                       |          |
| 47 |                         |     |                                                                                                                                                                                                                                                                                                                                                       |          |
| 48 |                         |     |                                                                                                                                                                                                                                                                                                                                                       |          |
| 49 | Incremental costs and   | 19  | For each intervention, report mean values for the main categories of estimated costs and outcomes of interest, as well as mean differences between the comparator groups. If applicable, report incremental cost-effectiveness ratios.                                                                                                                | Table 3  |
| 50 | outcomes                |     |                                                                                                                                                                                                                                                                                                                                                       |          |
| 51 |                         |     |                                                                                                                                                                                                                                                                                                                                                       |          |
| 52 |                         |     |                                                                                                                                                                                                                                                                                                                                                       |          |
| 53 | Characterising          | 20a | <i>Single study-based economic evaluation:</i> Describe the effects of sampling uncertainty for the estimated incremental cost and incremental effectiveness parameters, together with the impact                                                                                                                                                     | NA       |
| 54 | uncertainty             |     |                                                                                                                                                                                                                                                                                                                                                       |          |
| 55 |                         |     |                                                                                                                                                                                                                                                                                                                                                       |          |
| 56 |                         |     |                                                                                                                                                                                                                                                                                                                                                       |          |
| 57 |                         |     |                                                                                                                                                                                                                                                                                                                                                       |          |
| 58 |                         |     |                                                                                                                                                                                                                                                                                                                                                       |          |
| 59 |                         |     |                                                                                                                                                                                                                                                                                                                                                       |          |
| 60 |                         |     |                                                                                                                                                                                                                                                                                                                                                       |          |

|    |                       |                                                                      |            |
|----|-----------------------|----------------------------------------------------------------------|------------|
| 1  |                       | of methodological assumptions (such as discount rate, study          |            |
| 2  |                       | perspective).                                                        |            |
| 3  |                       |                                                                      |            |
| 4  | 20b                   | <i>Model-based economic evaluation</i> : Describe the effects on the |            |
| 5  |                       | results of uncertainty for all input parameters, and uncertainty     |            |
| 6  |                       | related to the structure of the model and assumptions.               | Page 10    |
| 7  | Characterising        | 21                                                                   |            |
| 8  | heterogeneity         |                                                                      |            |
| 9  |                       | If applicable, report differences in costs, outcomes, or cost-       |            |
| 10 |                       | effectiveness that can be explained by variations between            |            |
| 11 |                       | subgroups of patients with different baseline characteristics or     |            |
| 12 |                       | other observed variability in effects that are not reducible by      | NA         |
| 13 |                       | more information.                                                    |            |
| 14 | <b>Discussion</b>     |                                                                      |            |
| 15 | Study findings,       | 22                                                                   |            |
| 16 | limitations,          |                                                                      |            |
| 17 | generalisability, and |                                                                      |            |
| 18 | current knowledge     |                                                                      | Page 10-14 |
| 19 |                       | Summarise key study findings and describe how they support           |            |
| 20 | <b>Other</b>          |                                                                      |            |
| 21 | Source of funding     | 23                                                                   |            |
| 22 |                       |                                                                      |            |
| 23 |                       | Describe how the study was funded and the role of the funder         |            |
| 24 |                       | in the identification, design, conduct, and reporting of the         |            |
| 25 |                       | analysis. Describe other non-monetary sources of support.            | Page 14    |
| 26 | Conflicts of interest | 24                                                                   |            |
| 27 |                       |                                                                      |            |
| 28 |                       | Describe any potential for conflict of interest of study             |            |
| 29 |                       | contributors in accordance with journal policy. In the absence       |            |
| 30 |                       | of a journal policy, we recommend authors comply with                |            |
| 31 |                       | International Committee of Medical Journal Editors                   |            |
| 32 |                       | recommendations.                                                     | Page 14    |

For consistency, the CHEERS Statement checklist format is based on the format of the CONSORT statement checklist

The **ISPOR CHEERS Task Force Report** provides examples and further discussion of the 24-item CHEERS Checklist and the CHEERS Statement. It may be accessed via the *Value in Health* link or via the ISPOR Health Economic Evaluation Publication Guidelines – CHEERS: Good Reporting Practices webpage: <http://www.ispor.org/TaskForces/EconomicPubGuidelines.asp>

The citation for the CHEERS Task Force Report is:

Husereau D, Drummond M, Petrou S, et al. Consolidated health economic evaluation reporting standards (CHEERS)—Explanation and elaboration: A report of the ISPOR health economic evaluations publication guidelines good reporting practices task force. *Value Health* 2013;16:231-50.
